# Supplementary material for: The Valorization of Biolignin from Esparto Grass (Stipa tenacissima L.) Produced by Green Process CIMV (Compagnie Industrielle de la Matière Végétale) for Fertilization of Algerian Degraded Soil: Impact on the Physicochemical and Biological Properties
Source: MDPI journal article supplement (doi:10.3390/su132313462), 2021-12-06
Supplement: s1 [file s1]

## One-way ANOVA and Tukey Test (bacteria , fungi, Laccase, E4/E6)

### bacteria

#### One-way ANOVA: 0 versus bacteria

Method

Null hypothesis All means are equal  
Alternative hypothesis At least one mean is different  
Significance level  $\alpha = 0,05$

Equal variances were assumed for the analysis.

Factor Information

| Factor   | Levels | Values     |
|----------|--------|------------|
| bacteria | 3      | D0; D1; D2 |

Analysis of Variance

| Source   | DF | Adj SS | Adj MS | F-Value | P-Value |
|----------|----|--------|--------|---------|---------|
| bacteria | 2  | 2600   | 1300,0 | 4,33    | 0,068   |
| Error    | 6  | 1800   | 300,0  |         |         |
| Total    | 8  | 4400   |        |         |         |

Model Summary

| S       | R-sq   | R-sq(adj) | R-sq(pred) |
|---------|--------|-----------|------------|
| 17,3205 | 59,09% | 45,45%    | 7,95%      |

Means

| bacteria | N | Mean   | StDev | 95% CI          |
|----------|---|--------|-------|-----------------|
| D0       | 3 | 110,00 | 10,00 | (85,53; 134,47) |
| D1       | 3 | 150,0  | 20,0  | (125,5; 174,5)  |
| D2       | 3 | 140,0  | 20,0  | (115,5; 164,5)  |

Pooled StDev = 17,3205

### Tukey Pairwise Comparisons

Grouping Information Using the Tukey Method and 95% Confidence

| bacteria | N | Mean   | Grouping |
|----------|---|--------|----------|
| D1       | 3 | 150,0  | A        |
| D2       | 3 | 140,0  | A        |
| D0       | 3 | 110,00 | A        |

Means that do not share a letter are significantly different.

## One-way ANOVA: 30 versus bacteria

### Method

Null hypothesis All means are equal  
Alternative hypothesis At least one mean is different  
Significance level  $\alpha = 0,05$

Equal variances were assumed for the analysis.

### Factor Information

| Factor   | Levels | Values     |
|----------|--------|------------|
| bacteria | 3      | D0; D1; D2 |

### Analysis of Variance

| Source   | DF | Adj SS      | Adj MS     | F-Value | P-Value |
|----------|----|-------------|------------|---------|---------|
| bacteria | 2  | 18278000000 | 9139000000 | 4569,50 | 0,000   |
| Error    | 6  | 12000000    | 2000000    |         |         |
| Total    | 8  | 18290000000 |            |         |         |

### Model Summary

| S       | R-sq   | R-sq(adj) | R-sq(pred) |
|---------|--------|-----------|------------|
| 1414,21 | 99,93% | 99,91%    | 99,85%     |

### Means

| bacteria | N | Mean   | StDev | 95% CI           |
|----------|---|--------|-------|------------------|
| D0       | 3 | 129000 | 1000  | (127002; 130998) |
| D1       | 3 | 152000 | 2000  | (150002; 153998) |
| D2       | 3 | 47000  | 1000  | ( 45002; 48998)  |

Pooled StDev = 1414,21

## Tukey Pairwise Comparisons

### Grouping Information Using the Tukey Method and 95% Confidence

| bacteria | N | Mean   | Grouping |
|----------|---|--------|----------|
| D1       | 3 | 152000 | A        |
| D0       | 3 | 129000 | B        |
| D2       | 3 | 47000  | C        |

Means that do not share a letter are significantly different.

## One-way ANOVA: 60 versus bacteria

### Method

Null hypothesis All means are equal  
Alternative hypothesis At least one mean is different  
Significance level  $\alpha = 0,05$

Equal variances were assumed for the analysis.

### Factor Information

| Factor   | Levels | Values     |
|----------|--------|------------|
| bacteria | 3      | D0; D1; D2 |

### Analysis of Variance

| Source   | DF | Adj SS | Adj MS | F-Value | P-Value |
|----------|----|--------|--------|---------|---------|
| bacteria | 2  | 1800   | 900,0  | 3,86    | 0,084   |
| Error    | 6  | 1400   | 233,3  |         |         |
| Total    | 8  | 3200   |        |         |         |

### Model Summary

| S       | R-sq   | R-sq(adj) | R-sq(pred) |
|---------|--------|-----------|------------|
| 15,2753 | 56,25% | 41,67%    | 1,56%      |

### Means

| bacteria | N | Mean  | StDev | 95% CI         |
|----------|---|-------|-------|----------------|
| D0       | 3 | 100,0 | 0,0   | ( 78,4; 121,6) |
| D1       | 3 | 130,0 | 17,3  | (108,4; 151,6) |
| D2       | 3 | 130,0 | 20,0  | (108,4; 151,6) |

Pooled StDev = 15,2753

## Tukey Pairwise Comparisons

### Grouping Information Using the Tukey Method and 95% Confidence

| bacteria | N | Mean  | Grouping |
|----------|---|-------|----------|
| D2       | 3 | 130,0 | A        |
| D1       | 3 | 130,0 | A        |
| D0       | 3 | 100,0 | A        |

Means that do not share a letter are significantly different.

## One-way ANOVA: 90 versus bacteria

### Method

Null hypothesis All means are equal  
Alternative hypothesis At least one mean is different  
Significance level  $\alpha = 0,05$

Equal variances were assumed for the analysis.

### Factor Information

| Factor   | Levels | Values     |
|----------|--------|------------|
| bacteria | 3      | D0; D1; D2 |

### Analysis of Variance

| Source   | DF | Adj SS     | Adj MS    | F-Value | P-Value |
|----------|----|------------|-----------|---------|---------|
| bacteria | 2  | 1262000000 | 631000000 | 35,06   | 0,000   |
| Error    | 6  | 108000000  | 18000000  |         |         |
| Total    | 8  | 1370000000 |           |         |         |

### Model Summary

| S       | R-sq   | R-sq(adj) | R-sq(pred) |
|---------|--------|-----------|------------|
| 4242,64 | 92,12% | 89,49%    | 82,26%     |

### Means

| bacteria | N | Mean   | StDev | 95% CI          |
|----------|---|--------|-------|-----------------|
| D0       | 3 | 72000  | 2000  | (66006; 77994)  |
| D1       | 3 | 101000 | 1000  | (95006; 106994) |
| D2       | 3 | 87000  | 7000  | (81006; 92994)  |

Pooled StDev = 4242,64

## Tukey Pairwise Comparisons

### Grouping Information Using the Tukey Method and 95% Confidence

| bacteria | N | Mean   | Grouping |
|----------|---|--------|----------|
| D1       | 3 | 101000 | A        |
| D2       | 3 | 87000  | B        |
| D0       | 3 | 72000  | C        |

Means that do not share a letter are significantly different.

## One-way ANOVA: 120 versus bacteria

### Method

Null hypothesis All means are equal  
Alternative hypothesis At least one mean is different  
Significance level  $\alpha = 0,05$

Equal variances were assumed for the analysis.

### Factor Information

| Factor   | Levels | Values     |
|----------|--------|------------|
| bacteria | 3      | D0; D1; D2 |

### Analysis of Variance

| Source   | DF | Adj SS     | Adj MS     | F-Value | P-Value |
|----------|----|------------|------------|---------|---------|
| bacteria | 2  | 5432000000 | 2716000000 | 61,73   | 0,000   |
| Error    | 6  | 264000000  | 44000000   |         |         |
| Total    | 8  | 5696000000 |            |         |         |

### Model Summary

| S       | R-sq   | R-sq(adj) | R-sq(pred) |
|---------|--------|-----------|------------|
| 6633,25 | 95,37% | 93,82%    | 89,57%     |

### Means

| bacteria | N | Mean   | StDev | 95% CI          |
|----------|---|--------|-------|-----------------|
| D0       | 3 | 40000  | 4000  | (30629; 49371)  |
| D1       | 3 | 66000  | 4000  | (56629; 75371)  |
| D2       | 3 | 100000 | 10000 | (90629; 109371) |

Pooled StDev = 6633,25

## Tukey Pairwise Comparisons

Grouping Information Using the Tukey Method and 95% Confidence

| bacteria | N | Mean   | Grouping |
|----------|---|--------|----------|
| D2       | 3 | 100000 | A        |
| D1       | 3 | 66000  | B        |
| D0       | 3 | 40000  | C        |

Means that do not share a letter are significantly different.

## One-way ANOVA: 180 day versus bacteria

Method

Null hypothesis All means are equal  
Alternative hypothesis At least one mean is different  
Significance level  $\alpha = 0,05$

Equal variances were assumed for the analysis.

Factor Information

| Factor   | Levels | Values     |
|----------|--------|------------|
| bacteria | 3      | D0; D1; D2 |

Analysis of Variance

| Source   | DF | Adj SS      | Adj MS      | F-Value | P-Value |
|----------|----|-------------|-------------|---------|---------|
| bacteria | 2  | 25800000000 | 12900000000 | 64,50   | 0,000   |
| Error    | 6  | 1200000000  | 200000000   |         |         |
| Total    | 8  | 27000000000 |             |         |         |

Model Summary

| S       | R-sq   | R-sq(adj) | R-sq(pred) |
|---------|--------|-----------|------------|
| 14142,1 | 95,56% | 94,07%    | 90,00%     |

Means

| bacteria | N | Mean   | StDev | 95% CI           |
|----------|---|--------|-------|------------------|
| D0       | 3 | 20000  | 10000 | ( 21; 39979)     |
| D1       | 3 | 150000 | 10000 | (130021; 169979) |
| D2       | 3 | 70000  | 20000 | ( 50021; 89979)  |

Pooled StDev = 14142,1

## Tukey Pairwise Comparisons

Grouping Information Using the Tukey Method and 95% Confidence

| bacteria | N | Mean   | Grouping |
|----------|---|--------|----------|
| D1       | 3 | 150000 | A        |
| D2       | 3 | 70000  | B        |
| D0       | 3 | 20000  | C        |

Means that do not share a letter are significantly different.

## FUNGI

### One-way ANOVA: d0 versus FUNGI

#### Method

Null hypothesis All means are equal  
Alternative hypothesis At least one mean is different  
Significance level  $\alpha = 0,05$

Equal variances were assumed for the analysis.

#### Factor Information

| Factor | Levels | Values     |
|--------|--------|------------|
| FUNGI  | 3      | D0; D1; D2 |

#### Analysis of Variance

| Source | DF | Adj SS   | Adj MS   | F-Value | P-Value |
|--------|----|----------|----------|---------|---------|
| FUNGI  | 2  | 71239200 | 35619600 | 10,69   | 0,011   |
| Error  | 6  | 20000800 | 3333467  |         |         |
| Total  | 8  | 91240000 |          |         |         |

#### Model Summary

| S       | R-sq   | R-sq(adj) | R-sq(pred) |
|---------|--------|-----------|------------|
| 1825,78 | 78,08% | 70,77%    | 50,68%     |

#### Means

| FUNGI | N | Mean  | StDev | 95% CI            |
|-------|---|-------|-------|-------------------|
| D0    | 3 | 7000  | 3000  | ( 4421; 9579)     |
| D1    | 3 | 140,0 | 20,0  | (-2439,3; 2719,3) |
| D2    | 3 | 3000  | 1000  | ( 421; 5579)      |

Pooled StDev = 1825,78

### Tukey Pairwise Comparisons

#### Grouping Information Using the Tukey Method and 95% Confidence

| FUNGI | N | Mean  | Grouping |
|-------|---|-------|----------|
| D0    | 3 | 7000  | A        |
| D2    | 3 | 3000  | A B      |
| D1    | 3 | 140,0 | B        |

Means that do not share a letter are significantly different.

## One-way ANOVA: d30 versus FUNGI

### Method

Null hypothesis All means are equal  
Alternative hypothesis At least one mean is different  
Significance level  $\alpha = 0,05$

Equal variances were assumed for the analysis.

### Factor Information

| Factor | Levels | Values     |
|--------|--------|------------|
| FUNGI  | 3      | D0; D1; D2 |

### Analysis of Variance

| Source | DF | Adj SS     | Adj MS    | F-Value | P-Value |
|--------|----|------------|-----------|---------|---------|
| FUNGI  | 2  | 338000000  | 169000000 | 1,21    | 0,361   |
| Error  | 6  | 836000000  | 139333333 |         |         |
| Total  | 8  | 1174000000 |           |         |         |

### Model Summary

| S       | R-sq   | R-sq(adj) | R-sq(pred) |
|---------|--------|-----------|------------|
| 11804,0 | 28,79% | 5,05%     | 0,00%      |

### Means

| FUNGI | N | Mean  | StDev | 95% CI         |
|-------|---|-------|-------|----------------|
| D0    | 3 | 32000 | 3000  | (15324; 48676) |
| D1    | 3 | 40000 | 20000 | (23324; 56676) |
| D2    | 3 | 47000 | 3000  | (30324; 63676) |

Pooled StDev = 11804,0

## Tukey Pairwise Comparisons

Grouping Information Using the Tukey Method and 95% Confidence

| FUNGI | N | Mean  | Grouping |
|-------|---|-------|----------|
| D2    | 3 | 47000 | A        |
| D1    | 3 | 40000 | A        |
| D0    | 3 | 32000 | A        |

Means that do not share a letter are significantly different.



## One-way ANOVA: d60 versus FUNGI

### Method

Null hypothesis All means are equal  
Alternative hypothesis At least one mean is different  
Significance level  $\alpha = 0,05$

Equal variances were assumed for the analysis.

### Factor Information

| Factor | Levels | Values     |
|--------|--------|------------|
| FUNGI  | 3      | D0; D1; D2 |

### Analysis of Variance

| Source | DF | Adj SS   | Adj MS   | F-Value | P-Value |
|--------|----|----------|----------|---------|---------|
| FUNGI  | 2  | 56000000 | 28000000 | 9,33    | 0,014   |
| Error  | 6  | 18000000 | 3000000  |         |         |
| Total  | 8  | 74000000 |          |         |         |

### Model Summary

| S       | R-sq   | R-sq(adj) | R-sq(pred) |
|---------|--------|-----------|------------|
| 1732,05 | 75,68% | 67,57%    | 45,27%     |

### Means

| FUNGI | N | Mean | StDev | 95% CI        |
|-------|---|------|-------|---------------|
| D0    | 3 | 4000 | 2000  | (1553; 6447)  |
| D1    | 3 | 2000 | 1000  | (-447; 4447)  |
| D2    | 3 | 8000 | 2000  | (5553; 10447) |

Pooled StDev = 1732,05

## Tukey Pairwise Comparisons

Grouping Information Using the Tukey Method and 95% Confidence

| FUNGI | N | Mean | Grouping |
|-------|---|------|----------|
| D2    | 3 | 8000 | A        |
| D0    | 3 | 4000 | A B      |
| D1    | 3 | 2000 | B        |

Means that do not share a letter are significantly different.

## One-way ANOVA: d90 versus FUNGI

### Method

Null hypothesis All means are equal  
Alternative hypothesis At least one mean is different  
Significance level  $\alpha = 0,05$

Equal variances were assumed for the analysis.

### Factor Information

| Factor | Levels | Values     |
|--------|--------|------------|
| FUNGI  | 3      | D0; D1; D2 |

### Analysis of Variance

| Source | DF | Adj SS    | Adj MS    | F-Value | P-Value |
|--------|----|-----------|-----------|---------|---------|
| FUNGI  | 2  | 422000000 | 211000000 | 211,00  | 0,000   |
| Error  | 6  | 6000000   | 1000000   |         |         |
| Total  | 8  | 428000000 |           |         |         |

### Model Summary

| S    | R-sq   | R-sq(adj) | R-sq(pred) |
|------|--------|-----------|------------|
| 1000 | 98,60% | 98,13%    | 96,85%     |

### Means

| FUNGI | N | Mean  | StDev | 95% CI         |
|-------|---|-------|-------|----------------|
| D0    | 3 | 4000  | 1000  | ( 2587; 5413)  |
| D1    | 3 | 5000  | 1000  | ( 3587; 6413)  |
| D2    | 3 | 19000 | 1000  | (17587; 20413) |

Pooled StDev = 1000

## Tukey Pairwise Comparisons

Grouping Information Using the Tukey Method and 95% Confidence

| FUNGI | N | Mean  | Grouping |
|-------|---|-------|----------|
| D2    | 3 | 19000 | A        |
| D1    | 3 | 5000  | B        |
| D0    | 3 | 4000  | B        |

Means that do not share a letter are significantly different.

## One-way ANOVA: d120 versus FUNGI

### Method

Null hypothesis All means are equal  
Alternative hypothesis At least one mean is different  
Significance level  $\alpha = 0,05$

Equal variances were assumed for the analysis.

### Factor Information

| Factor | Levels | Values     |
|--------|--------|------------|
| FUNGI  | 3      | D0; D1; D2 |

### Analysis of Variance

| Source | DF | Adj SS    | Adj MS    | F-Value | P-Value |
|--------|----|-----------|-----------|---------|---------|
| FUNGI  | 2  | 679308800 | 339654400 | 46,32   | 0,000   |
| Error  | 6  | 44000800  | 7333467   |         |         |
| Total  | 8  | 723309600 |           |         |         |

### Model Summary

| S       | R-sq   | R-sq(adj) | R-sq(pred) |
|---------|--------|-----------|------------|
| 2708,04 | 93,92% | 91,89%    | 86,31%     |

### Means

| FUNGI | N | Mean  | StDev | 95% CI            |
|-------|---|-------|-------|-------------------|
| D0    | 3 | 120,0 | 20,0  | (-3705,7; 3945,7) |
| D1    | 3 | 7000  | 1732  | ( 3174; 10826)    |
| D2    | 3 | 21000 | 4359  | ( 17174; 24826)   |

Pooled StDev = 2708,04

## Tukey Pairwise Comparisons

Grouping Information Using the Tukey Method and 95% Confidence

| FUNGI | N | Mean  | Grouping |
|-------|---|-------|----------|
| D2    | 3 | 21000 | A        |
| D1    | 3 | 7000  | B        |
| D0    | 3 | 120,0 | C        |

Means that do not share a letter are significantly different.

## One-way ANOVA: 180 d versus FUNGI

### Method

Null hypothesis All means are equal  
Alternative hypothesis At least one mean is different  
Significance level  $\alpha = 0,05$

Equal variances were assumed for the analysis.

### Factor Information

| Factor | Levels | Values     |
|--------|--------|------------|
| FUNGI  | 3      | D0; D1; D2 |

### Analysis of Variance

| Source | DF | Adj SS    | Adj MS    | F-Value | P-Value |
|--------|----|-----------|-----------|---------|---------|
| FUNGI  | 2  | 878000000 | 439000000 | 87,80   | 0,000   |
| Error  | 6  | 30000000  | 5000000   |         |         |
| Total  | 8  | 908000000 |           |         |         |

### Model Summary

| S       | R-sq   | R-sq(adj) | R-sq(pred) |
|---------|--------|-----------|------------|
| 2236,07 | 96,70% | 95,59%    | 92,57%     |

### Means

| FUNGI | N | Mean  | StDev | 95% CI         |
|-------|---|-------|-------|----------------|
| D0    | 3 | 30000 | 2000  | (26841; 33159) |
| D1    | 3 | 12000 | 2646  | ( 8841; 15159) |
| D2    | 3 | 7000  | 2000  | ( 3841; 10159) |

Pooled StDev = 2236,07

## Tukey Pairwise Comparisons

### Grouping Information Using the Tukey Method and 95% Confidence

| FUNGI | N | Mean  | Grouping |
|-------|---|-------|----------|
| D0    | 3 | 30000 | A        |
| D1    | 3 | 12000 | B        |
| D2    | 3 | 7000  | B        |

Means that do not share a letter are significantly different.

## Laccase

### One-way ANOVA: d0 versus Laccase

#### Method

Null hypothesis All means are equal  
Alternative hypothesis At least one mean is different  
Significance level  $\alpha = 0,05$

Equal variances were assumed for the analysis.

#### Factor Information

| Factor  | Levels | Values     |
|---------|--------|------------|
| Laccase | 3      | D0; D1; D2 |

#### Analysis of Variance

| Source  | DF | Adj SS  | Adj MS   | F-Value | P-Value |
|---------|----|---------|----------|---------|---------|
| Laccase | 2  | 0,96362 | 0,481811 | 175,56  | 0,000   |
| Error   | 6  | 0,01647 | 0,002744 |         |         |
| Total   | 8  | 0,98009 |          |         |         |

#### Model Summary

| S         | R-sq   | R-sq(adj) | R-sq(pred) |
|-----------|--------|-----------|------------|
| 0,0523874 | 98,32% | 97,76%    | 96,22%     |

#### Means

| Laccase | N | Mean    | StDev   | 95% CI             |
|---------|---|---------|---------|--------------------|
| D0      | 3 | 0,5900  | 0,0854  | ( 0,5160; 0,6640)  |
| D1      | 3 | 0,4200  | 0,0265  | ( 0,3460; 0,4940)  |
| D2      | 3 | 1,18333 | 0,01528 | (1,10932; 1,25734) |

Pooled StDev = 0,0523874

## Tukey Pairwise Comparisons

#### Grouping Information Using the Tukey Method and 95% Confidence

| Laccase | N | Mean    | Grouping |
|---------|---|---------|----------|
| D2      | 3 | 1,18333 | A        |
| D0      | 3 | 0,5900  | B        |
| D1      | 3 | 0,4200  | C        |

Means that do not share a letter are significantly different.

## One-way ANOVA: d30 versus Laccase

### Method

Null hypothesis All means are equal  
Alternative hypothesis At least one mean is different  
Significance level  $\alpha = 0,05$

Equal variances were assumed for the analysis.

### Factor Information

| Factor  | Levels | Values     |
|---------|--------|------------|
| Laccase | 3      | D0; D1; D2 |

### Analysis of Variance

| Source  | DF | Adj SS  | Adj MS  | F-Value | P-Value |
|---------|----|---------|---------|---------|---------|
| Laccase | 2  | 8,56980 | 4,28490 | 6765,63 | 0,000   |
| Error   | 6  | 0,00380 | 0,00063 |         |         |
| Total   | 8  | 8,57360 |         |         |         |

### Model Summary

| S         | R-sq   | R-sq(adj) | R-sq(pred) |
|-----------|--------|-----------|------------|
| 0,0251661 | 99,96% | 99,94%    | 99,90%     |

### Means

| Laccase | N | Mean   | StDev  | 95% CI           |
|---------|---|--------|--------|------------------|
| D0      | 3 | 0,8967 | 0,0252 | (0,8611; 0,9322) |
| D1      | 3 | 0,8967 | 0,0252 | (0,8611; 0,9322) |
| D2      | 3 | 2,9667 | 0,0252 | (2,9311; 3,0022) |

Pooled StDev = 0,0251661

## Tukey Pairwise Comparisons

### Grouping Information Using the Tukey Method and 95% Confidence

| Laccase | N | Mean   | Grouping |
|---------|---|--------|----------|
| D2      | 3 | 2,9667 | A        |
| D1      | 3 | 0,8967 | B        |
| D0      | 3 | 0,8967 | B        |

Means that do not share a letter are significantly different.

## One-way ANOVA: d60 versus Laccase

### Method

Null hypothesis All means are equal  
Alternative hypothesis At least one mean is different  
Significance level  $\alpha = 0,05$

Equal variances were assumed for the analysis.

### Factor Information

| Factor  | Levels | Values     |
|---------|--------|------------|
| Laccase | 3      | D0; D1; D2 |

### Analysis of Variance

| Source  | DF | Adj SS  | Adj MS   | F-Value | P-Value |
|---------|----|---------|----------|---------|---------|
| Laccase | 2  | 0,04536 | 0,022678 | 8,07    | 0,020   |
| Error   | 6  | 0,01687 | 0,002811 |         |         |
| Total   | 8  | 0,06222 |          |         |         |

### Model Summary

| S         | R-sq   | R-sq(adj) | R-sq(pred) |
|-----------|--------|-----------|------------|
| 0,0530199 | 72,89% | 63,86%    | 39,01%     |

### Means

| Laccase | N | Mean   | StDev  | 95% CI           |
|---------|---|--------|--------|------------------|
| D0      | 3 | 0,7600 | 0,0361 | (0,6851; 0,8349) |
| D1      | 3 | 0,7300 | 0,0700 | (0,6551; 0,8049) |
| D2      | 3 | 0,5967 | 0,0473 | (0,5218; 0,6716) |

Pooled StDev = 0,0530199

## Tukey Pairwise Comparisons

### Grouping Information Using the Tukey Method and 95% Confidence

| Laccase | N | Mean   | Grouping |
|---------|---|--------|----------|
| D0      | 3 | 0,7600 | A        |
| D1      | 3 | 0,7300 | A        |
| D2      | 3 | 0,5967 | B        |

Means that do not share a letter are significantly different.

## One-way ANOVA: d90 versus Laccase

### Method

Null hypothesis All means are equal  
Alternative hypothesis At least one mean is different  
Significance level  $\alpha = 0,05$

Equal variances were assumed for the analysis.

### Factor Information

| Factor  | Levels | Values     |
|---------|--------|------------|
| Laccase | 3      | D0; D1; D2 |

### Analysis of Variance

| Source  | DF | Adj SS  | Adj MS  | F-Value | P-Value |
|---------|----|---------|---------|---------|---------|
| Laccase | 2  | 17,1144 | 8,55720 | 1944,82 | 0,000   |
| Error   | 6  | 0,0264  | 0,00440 |         |         |
| Total   | 8  | 17,1408 |         |         |         |

### Model Summary

| S         | R-sq   | R-sq(adj) | R-sq(pred) |
|-----------|--------|-----------|------------|
| 0,0663325 | 99,85% | 99,79%    | 99,65%     |

### Means

| Laccase | N | Mean    | StDev   | 95% CI             |
|---------|---|---------|---------|--------------------|
| D0      | 3 | 0,56000 | 0,01000 | (0,46629; 0,65371) |
| D1      | 3 | 3,9200  | 0,1058  | ( 3,8263; 4,0137)  |
| D2      | 3 | 1,9400  | 0,0436  | ( 1,8463; 2,0337)  |

Pooled StDev = 0,0663325

## Tukey Pairwise Comparisons

### Grouping Information Using the Tukey Method and 95% Confidence

| Laccase | N | Mean    | Grouping |
|---------|---|---------|----------|
| D1      | 3 | 3,9200  | A        |
| D2      | 3 | 1,9400  | B        |
| D0      | 3 | 0,56000 | C        |

Means that do not share a letter are significantly different.



## One-way ANOVA: d120 versus Laccase

### Method

Null hypothesis All means are equal  
Alternative hypothesis At least one mean is different  
Significance level  $\alpha = 0,05$

Equal variances were assumed for the analysis.

### Factor Information

| Factor  | Levels | Values     |
|---------|--------|------------|
| Laccase | 3      | D0; D1; D2 |

### Analysis of Variance

| Source  | DF | Adj SS  | Adj MS  | F-Value | P-Value |
|---------|----|---------|---------|---------|---------|
| Laccase | 2  | 20,4470 | 10,2235 | 399,18  | 0,000   |
| Error   | 6  | 0,1537  | 0,0256  |         |         |
| Total   | 8  | 20,6007 |         |         |         |

### Model Summary

| S        | R-sq   | R-sq(adj) | R-sq(pred) |
|----------|--------|-----------|------------|
| 0,160035 | 99,25% | 99,01%    | 98,32%     |

### Means

| Laccase | N | Mean    | StDev   | 95% CI             |
|---------|---|---------|---------|--------------------|
| D0      | 3 | 0,85000 | 0,01000 | (0,62391; 1,07609) |
| D1      | 3 | 1,27000 | 0,01000 | (1,04391; 1,49609) |
| D2      | 3 | 4,237   | 0,277   | ( 4,011; 4,463)    |

Pooled StDev = 0,160035

## Tukey Pairwise Comparisons

### Grouping Information Using the Tukey Method and 95% Confidence

| Laccase | N | Mean    | Grouping |
|---------|---|---------|----------|
| D2      | 3 | 4,237   | A        |
| D1      | 3 | 1,27000 | B        |
| D0      | 3 | 0,85000 | C        |

Means that do not share a letter are significantly different.

## One-way ANOVA: 180 d versus Laccase

### Method

Null hypothesis All means are equal  
Alternative hypothesis At least one mean is different  
Significance level  $\alpha = 0,05$

Equal variances were assumed for the analysis.

### Factor Information

| Factor  | Levels | Values     |
|---------|--------|------------|
| Laccase | 3      | D0; D1; D2 |

### Analysis of Variance

| Source  | DF | Adj SS   | Adj MS   | F-Value | P-Value |
|---------|----|----------|----------|---------|---------|
| Laccase | 2  | 0,353400 | 0,176700 | 147,25  | 0,000   |
| Error   | 6  | 0,007200 | 0,001200 |         |         |
| Total   | 8  | 0,360600 |          |         |         |

### Model Summary

| S         | R-sq   | R-sq(adj) | R-sq(pred) |
|-----------|--------|-----------|------------|
| 0,0346410 | 98,00% | 97,34%    | 95,51%     |

### Means

| Laccase | N | Mean   | StDev  | 95% CI           |
|---------|---|--------|--------|------------------|
| D0      | 3 | 1,2500 | 0,0436 | (1,2011; 1,2989) |
| D1      | 3 | 0,8400 | 0,0361 | (0,7911; 0,8889) |
| D2      | 3 | 1,2700 | 0,0200 | (1,2211; 1,3189) |

Pooled StDev = 0,0346410

## Tukey Pairwise Comparisons

### Grouping Information Using the Tukey Method and 95% Confidence

| Laccase | N | Mean   | Grouping |
|---------|---|--------|----------|
| D2      | 3 | 1,2700 | A        |
| D0      | 3 | 1,2500 | A        |
| D1      | 3 | 0,8400 | B        |

Means that do not share a letter are significantly different.

## E4/E6

### One-way ANOVA: d0 versus E4/E6

#### Method

Null hypothesis All means are equal  
Alternative hypothesis At least one mean is different  
Significance level  $\alpha = 0,05$

Equal variances were assumed for the analysis.

#### Factor Information

| Factor | Levels | Values     |
|--------|--------|------------|
| E4/E6  | 3      | D0; D1; D2 |

#### Analysis of Variance

| Source | DF | Adj SS | Adj MS | F-Value | P-Value |
|--------|----|--------|--------|---------|---------|
| E4/E6  | 2  | 19,822 | 9,9109 | 34,85   | 0,000   |
| Error  | 6  | 1,706  | 0,2844 |         |         |
| Total  | 8  | 21,528 |        |         |         |

#### Model Summary

| S        | R-sq   | R-sq(adj) | R-sq(pred) |
|----------|--------|-----------|------------|
| 0,533266 | 92,07% | 89,43%    | 82,17%     |

#### Means

| E4/E6 | N | Mean   | StDev  | 95% CI            |
|-------|---|--------|--------|-------------------|
| D0    | 3 | 0,5337 | 0,1095 | (-0,2197; 1,2870) |
| D1    | 3 | 2,250  | 0,220  | ( 1,497; 3,003)   |
| D2    | 3 | 4,167  | 0,890  | ( 3,414; 4,920)   |

Pooled StDev = 0,533266

## Tukey Pairwise Comparisons

#### Grouping Information Using the Tukey Method and 95% Confidence

| E4/E6 | N | Mean   | Grouping |
|-------|---|--------|----------|
| D2    | 3 | 4,167  | A        |
| D1    | 3 | 2,250  | B        |
| D0    | 3 | 0,5337 | C        |

Means that do not share a letter are significantly different.

## One-way ANOVA: d30 versus E4/E6

### Method

Null hypothesis All means are equal  
Alternative hypothesis At least one mean is different  
Significance level  $\alpha = 0,05$

Equal variances were assumed for the analysis.

### Factor Information

| Factor | Levels | Values     |
|--------|--------|------------|
| E4/E6  | 3      | D0; D1; D2 |

### Analysis of Variance

| Source | DF | Adj SS  | Adj MS  | F-Value | P-Value |
|--------|----|---------|---------|---------|---------|
| E4/E6  | 2  | 201,203 | 100,601 | 65,09   | 0,000   |
| Error  | 6  | 9,273   | 1,545   |         |         |
| Total  | 8  | 210,476 |         |         |         |

### Model Summary

| S       | R-sq   | R-sq(adj) | R-sq(pred) |
|---------|--------|-----------|------------|
| 1,24318 | 95,59% | 94,13%    | 90,09%     |

### Means

| E4/E6 | N | Mean  | StDev | 95% CI          |
|-------|---|-------|-------|-----------------|
| D0    | 3 | 1,136 | 0,341 | (-0,620; 2,893) |
| D1    | 3 | 12,60 | 1,90  | ( 10,84; 14,36) |
| D2    | 3 | 5,440 | 0,954 | ( 3,684; 7,196) |

Pooled StDev = 1,24318

## Tukey Pairwise Comparisons

Grouping Information Using the Tukey Method and 95% Confidence

| E4/E6 | N | Mean  | Grouping |
|-------|---|-------|----------|
| D1    | 3 | 12,60 | A        |
| D2    | 3 | 5,440 | B        |
| D0    | 3 | 1,136 | C        |

Means that do not share a letter are significantly different.

## One-way ANOVA: d60 versus E4/E6

### Method

Null hypothesis All means are equal  
Alternative hypothesis At least one mean is different  
Significance level  $\alpha = 0,05$

Equal variances were assumed for the analysis.

### Factor Information

| Factor | Levels | Values     |
|--------|--------|------------|
| E4/E6  | 3      | D0; D1; D2 |

### Analysis of Variance

| Source | DF | Adj SS  | Adj MS  | F-Value | P-Value |
|--------|----|---------|---------|---------|---------|
| E4/E6  | 2  | 206,384 | 103,192 | 410,79  | 0,000   |
| Error  | 6  | 1,507   | 0,251   |         |         |
| Total  | 8  | 207,891 |         |         |         |

### Model Summary

| S        | R-sq   | R-sq(adj) | R-sq(pred) |
|----------|--------|-----------|------------|
| 0,501201 | 99,27% | 99,03%    | 98,37%     |

### Means

| E4/E6 | N | Mean   | StDev | 95% CI           |
|-------|---|--------|-------|------------------|
| D0    | 3 | 1,182  | 0,282 | ( 0,474; 1,890)  |
| D1    | 3 | 4,857  | 0,207 | ( 4,149; 5,565)  |
| D2    | 3 | 12,667 | 0,795 | (11,959; 13,375) |

Pooled StDev = 0,501201

## Tukey Pairwise Comparisons

### Grouping Information Using the Tukey Method and 95% Confidence

| E4/E6 | N | Mean   | Grouping |
|-------|---|--------|----------|
| D2    | 3 | 12,667 | A        |
| D1    | 3 | 4,857  | B        |
| D0    | 3 | 1,182  | C        |

Means that do not share a letter are significantly different.

## One-way ANOVA: d90 versus E4/E6

### Method

Null hypothesis All means are equal  
Alternative hypothesis At least one mean is different  
Significance level  $\alpha = 0,05$

Equal variances were assumed for the analysis.

### Factor Information

| Factor | Levels | Values     |
|--------|--------|------------|
| E4/E6  | 3      | D0; D1; D2 |

### Analysis of Variance

| Source | DF | Adj SS  | Adj MS  | F-Value | P-Value |
|--------|----|---------|---------|---------|---------|
| E4/E6  | 2  | 45,3892 | 22,6946 | 234,02  | 0,000   |
| Error  | 6  | 0,5819  | 0,0970  |         |         |
| Total  | 8  | 45,9710 |         |         |         |

### Model Summary

|          | S      | R-sq   | R-sq(adj) | R-sq(pred) |
|----------|--------|--------|-----------|------------|
| 0,311411 | 98,73% | 98,31% | 97,15%    |            |

### Means

| E4/E6 | N | Mean   | StDev  | 95% CI           |
|-------|---|--------|--------|------------------|
| D0    | 3 | 1,1113 | 0,0969 | (0,6714; 1,5513) |
| D1    | 3 | 0,9637 | 0,1554 | (0,5237; 1,4036) |
| D2    | 3 | 5,800  | 0,507  | ( 5,360; 6,240)  |

Pooled StDev = 0,311411

## Tukey Pairwise Comparisons

### Grouping Information Using the Tukey Method and 95% Confidence

| E4/E6 | N | Mean   | Grouping |
|-------|---|--------|----------|
| D2    | 3 | 5,800  | A        |
| D0    | 3 | 1,1113 | B        |
| D1    | 3 | 0,9637 | B        |

Means that do not share a letter are significantly different.

## One-way ANOVA: d120 versus E4/E6

### Method

Null hypothesis All means are equal  
Alternative hypothesis At least one mean is different  
Significance level  $\alpha = 0,05$

Equal variances were assumed for the analysis.

### Factor Information

| Factor | Levels | Values     |
|--------|--------|------------|
| E4/E6  | 3      | D0; D1; D2 |

### Analysis of Variance

| Source | DF | Adj SS  | Adj MS  | F-Value | P-Value |
|--------|----|---------|---------|---------|---------|
| E4/E6  | 2  | 129,927 | 64,9637 | 847,15  | 0,000   |
| Error  | 6  | 0,460   | 0,0767  |         |         |
| Total  | 8  | 130,388 |         |         |         |

### Model Summary

| S        | R-sq   | R-sq(adj) | R-sq(pred) |
|----------|--------|-----------|------------|
| 0,276920 | 99,65% | 99,53%    | 99,21%     |

### Means

| E4/E6 | N | Mean   | StDev  | 95% CI           |
|-------|---|--------|--------|------------------|
| D0    | 3 | 1,8177 | 0,0788 | (1,4265; 2,2089) |
| D1    | 3 | 1,412  | 0,296  | ( 1,020; 1,803)  |
| D2    | 3 | 9,667  | 0,369  | ( 9,276; 10,058) |

Pooled StDev = 0,276920

## Tukey Pairwise Comparisons

### Grouping Information Using the Tukey Method and 95% Confidence

| E4/E6 | N | Mean   | Grouping |
|-------|---|--------|----------|
| D2    | 3 | 9,667  | A        |
| D0    | 3 | 1,8177 | B        |
| D1    | 3 | 1,412  | B        |

Means that do not share a letter are significantly different.

## One-way ANOVA: 180 d versus E4/E6

### Method

Null hypothesis All means are equal  
Alternative hypothesis At least one mean is different  
Significance level  $\alpha = 0,05$

Equal variances were assumed for the analysis.

### Factor Information

| Factor | Levels | Values     |
|--------|--------|------------|
| E4/E6  | 3      | D0; D1; D2 |

### Analysis of Variance

| Source | DF | Adj SS | Adj MS  | F-Value | P-Value |
|--------|----|--------|---------|---------|---------|
| E4/E6  | 2  | 28,636 | 14,3182 | 33,52   | 0,001   |
| Error  | 6  | 2,563  | 0,4272  |         |         |
| Total  | 8  | 31,200 |         |         |         |

### Model Summary

| S        | R-sq   | R-sq(adj) | R-sq(pred) |
|----------|--------|-----------|------------|
| 0,653601 | 91,78% | 89,05%    | 81,52%     |

### Means

| E4/E6 | N | Mean  | StDev | 95% CI         |
|-------|---|-------|-------|----------------|
| D0    | 3 | 1,714 | 0,237 | (0,790; 2,637) |
| D1    | 3 | 2,667 | 0,785 | (1,743; 3,590) |
| D2    | 3 | 5,883 | 0,780 | (4,960; 6,806) |

Pooled StDev = 0,653601

## Tukey Pairwise Comparisons

Grouping Information Using the Tukey Method and 95% Confidence

| E4/E6 | N | Mean  | Grouping |
|-------|---|-------|----------|
| D2    | 3 | 5,883 | A        |
| D1    | 3 | 2,667 | B        |
| D0    | 3 | 1,714 | B        |

Means that do not share a letter are significantly different.
