# Supplementary material for: The Valorization of Biolignin from Esparto Grass (Stipa tenacissima L.) Produced by Green Process CIMV (Compagnie Industrielle de la Matière Végétale) for Fertilization of Algerian Degraded Soil: Impact on the Physicochemical and Biological Properties
Source: MDPI journal article supplement (doi:10.3390/su132313462), 2021-12-06
Supplement: s1 [file s1]

# One-way ANOVA and Tukey Test

## (pH,T°, W%,C%,N%,C/N)

### Soil temperature

#### One-way ANOVA: d0 versus Soil temperature

Method

Null hypothesis All means are equal  
Alternative hypothesis At least one mean is different  
Significance level  $\alpha = 0,05$

Equal variances were assumed for the analysis.

Factor Information

| Factor           | Levels | Values     |
|------------------|--------|------------|
| Soil temperature | 3      | D0; D1; D2 |

Analysis of Variance

| Source           | DF | Adj SS  | Adj MS  | F-Value | P-Value |
|------------------|----|---------|---------|---------|---------|
| Soil temperature | 2  | 0,00000 | 0,00000 | 0,00    | 1,000   |
| Error            | 6  | 6,00000 | 1,00000 |         |         |
| Total            | 8  | 6,00000 |         |         |         |

Model Summary

| S | R-sq  | R-sq(adj) | R-sq(pred) |
|---|-------|-----------|------------|
| 1 | 0,00% | 0,00%     | 0,00%      |

Means

| Soil temperature | N | Mean   | StDev | 95% CI           |
|------------------|---|--------|-------|------------------|
| D0               | 3 | 13,000 | 1,000 | (11,587; 14,413) |
| D1               | 3 | 13,000 | 1,000 | (11,587; 14,413) |
| D2               | 3 | 13,000 | 1,000 | (11,587; 14,413) |

Pooled StDev = 1

### Tukey Pairwise Comparisons

Grouping Information Using the Tukey Method and 95% Confidence

| Soil temperature | N | Mean   | Grouping |
|------------------|---|--------|----------|
| D2               | 3 | 13,000 | A        |
| D1               | 3 | 13,000 | A        |
| D0               | 3 | 13,000 | A        |

Means that do not share a letter are significantly different.

## One-way ANOVA: d15 versus Soil temperature

Method

Null hypothesis All means are equal  
Alternative hypothesis At least one mean is different  
Significance level  $\alpha = 0,05$

Equal variances were assumed for the analysis.

Factor Information

| Factor           | Levels | Values     |
|------------------|--------|------------|
| Soil temperature | 3      | D0; D1; D2 |

Analysis of Variance

| Source           | DF | Adj SS | Adj MS | F-Value | P-Value |
|------------------|----|--------|--------|---------|---------|
| Soil temperature | 2  | 6,000  | 3,0000 | 4,00    | 0,079   |
| Error            | 6  | 4,500  | 0,7500 |         |         |
| Total            | 8  | 10,500 |        |         |         |

Model Summary

| S        | R-sq   | R-sq(adj) | R-sq(pred) |
|----------|--------|-----------|------------|
| 0,866025 | 57,14% | 42,86%    | 3,57%      |

Means

| Soil temperature | N | Mean   | StDev | 95% CI           |
|------------------|---|--------|-------|------------------|
| D0               | 3 | 13,000 | 0,500 | (11,777; 14,223) |
| D1               | 3 | 12,000 | 1,000 | (10,777; 13,223) |
| D2               | 3 | 14,000 | 1,000 | (12,777; 15,223) |

Pooled StDev = 0,866025

## Tukey Pairwise Comparisons

Grouping Information Using the Tukey Method and 95% Confidence

| Soil temperature | N | Mean   | Grouping |
|------------------|---|--------|----------|
| D2               | 3 | 14,000 | A        |
| D0               | 3 | 13,000 | A        |
| D1               | 3 | 12,000 | A        |

Means that do not share a letter are significantly different.

## One-way ANOVA: d30 versus Soil temperature

### Method

Null hypothesis All means are equal  
Alternative hypothesis At least one mean is different  
Significance level  $\alpha = 0,05$

Equal variances were assumed for the analysis.

### Factor Information

| Factor           | Levels | Values     |
|------------------|--------|------------|
| Soil temperature | 3      | D0; D1; D2 |

### Analysis of Variance

| Source           | DF | Adj SS | Adj MS | F-Value | P-Value |
|------------------|----|--------|--------|---------|---------|
| Soil temperature | 2  | 2,000  | 1,000  | 0,60    | 0,579   |
| Error            | 6  | 10,000 | 1,667  |         |         |
| Total            | 8  | 12,000 |        |         |         |

### Model Summary

| S       | R-sq   | R-sq(adj) | R-sq(pred) |
|---------|--------|-----------|------------|
| 1,29099 | 16,67% | 0,00%     | 0,00%      |

### Means

| Soil temperature | N | Mean   | StDev | 95% CI           |
|------------------|---|--------|-------|------------------|
| D0               | 3 | 13,00  | 1,73  | ( 11,18; 14,82)  |
| D1               | 3 | 14,000 | 1,000 | (12,176; 15,824) |
| D2               | 3 | 14,000 | 1,000 | (12,176; 15,824) |

Pooled StDev = 1,29099

## Tukey Pairwise Comparisons

### Grouping Information Using the Tukey Method and 95% Confidence

| Soil temperature | N | Mean   | Grouping |
|------------------|---|--------|----------|
| D2               | 3 | 14,000 | A        |
| D1               | 3 | 14,000 | A        |
| D0               | 3 | 13,00  | A        |

Means that do not share a letter are significantly different.

## One-way ANOVA: d45 versus Soil temperature

### Method

Null hypothesis All means are equal  
Alternative hypothesis At least one mean is different  
Significance level  $\alpha = 0,05$

Equal variances were assumed for the analysis.

### Factor Information

| Factor           | Levels | Values     |
|------------------|--------|------------|
| Soil temperature | 3      | D0; D1; D2 |

### Analysis of Variance

| Source           | DF | Adj SS | Adj MS | F-Value | P-Value |
|------------------|----|--------|--------|---------|---------|
| Soil temperature | 2  | 6,000  | 3,0000 | 4,00    | 0,079   |
| Error            | 6  | 4,500  | 0,7500 |         |         |
| Total            | 8  | 10,500 |        |         |         |

### Model Summary

| S        | R-sq   | R-sq(adj) | R-sq(pred) |
|----------|--------|-----------|------------|
| 0,866025 | 57,14% | 42,86%    | 3,57%      |

### Means

| Soil temperature | N | Mean   | StDev | 95% CI           |
|------------------|---|--------|-------|------------------|
| D0               | 3 | 14,000 | 1,000 | (12,777; 15,223) |
| D1               | 3 | 15,000 | 0,500 | (13,777; 16,223) |
| D2               | 3 | 16,000 | 1,000 | (14,777; 17,223) |

Pooled StDev = 0,866025

## Tukey Pairwise Comparisons

### Grouping Information Using the Tukey Method and 95% Confidence

| Soil temperature | N | Mean   | Grouping |
|------------------|---|--------|----------|
| D2               | 3 | 16,000 | A        |
| D1               | 3 | 15,000 | A        |
| D0               | 3 | 14,000 | A        |

Means that do not share a letter are significantly different.

## One-way ANOVA: d60 versus Soil temperature

### Method

Null hypothesis All means are equal  
Alternative hypothesis At least one mean is different  
Significance level  $\alpha = 0,05$

Equal variances were assumed for the analysis.

### Factor Information

| Factor           | Levels | Values     |
|------------------|--------|------------|
| Soil temperature | 3      | D0; D1; D2 |

### Analysis of Variance

| Source           | DF | Adj SS | Adj MS | F-Value | P-Value |
|------------------|----|--------|--------|---------|---------|
| Soil temperature | 2  | 14,00  | 7,000  | 3,50    | 0,098   |
| Error            | 6  | 12,00  | 2,000  |         |         |
| Total            | 8  | 26,00  |        |         |         |

### Model Summary

| S       | R-sq   | R-sq(adj) | R-sq(pred) |
|---------|--------|-----------|------------|
| 1,41421 | 53,85% | 38,46%    | 0,00%      |

### Means

| Soil temperature | N | Mean   | StDev | 95% CI           |
|------------------|---|--------|-------|------------------|
| D0               | 3 | 19,000 | 1,000 | (17,002; 20,998) |
| D1               | 3 | 20,00  | 2,00  | ( 18,00; 22,00)  |
| D2               | 3 | 22,000 | 1,000 | (20,002; 23,998) |

Pooled StDev = 1,41421

## Tukey Pairwise Comparisons

### Grouping Information Using the Tukey Method and 95% Confidence

| Soil temperature | N | Mean   | Grouping |
|------------------|---|--------|----------|
| D2               | 3 | 22,000 | A        |
| D1               | 3 | 20,00  | A        |
| D0               | 3 | 19,000 | A        |

Means that do not share a letter are significantly different.

## One-way ANOVA: d75 versus Soil temperature

### Method

Null hypothesis All means are equal  
Alternative hypothesis At least one mean is different  
Significance level  $\alpha = 0,05$

Equal variances were assumed for the analysis.

### Factor Information

| Factor           | Levels | Values     |
|------------------|--------|------------|
| Soil temperature | 3      | D0; D1; D2 |

### Analysis of Variance

| Source           | DF | Adj SS | Adj MS | F-Value | P-Value |
|------------------|----|--------|--------|---------|---------|
| Soil temperature | 2  | 26,00  | 13,000 | 7,80    | 0,021   |
| Error            | 6  | 10,00  | 1,667  |         |         |
| Total            | 8  | 36,00  |        |         |         |

### Model Summary

| S       | R-sq   | R-sq(adj) | R-sq(pred) |
|---------|--------|-----------|------------|
| 1,29099 | 72,22% | 62,96%    | 37,50%     |

### Means

| Soil temperature | N | Mean   | StDev | 95% CI           |
|------------------|---|--------|-------|------------------|
| D0               | 3 | 18,000 | 1,000 | (16,176; 19,824) |
| D1               | 3 | 21,000 | 1,000 | (19,176; 22,824) |
| D2               | 3 | 22,00  | 1,73  | ( 20,18; 23,82)  |

Pooled StDev = 1,29099

## Tukey Pairwise Comparisons

### Grouping Information Using the Tukey Method and 95% Confidence

| Soil temperature | N | Mean   | Grouping |
|------------------|---|--------|----------|
| D2               | 3 | 22,00  | A        |
| D1               | 3 | 21,000 | A B      |
| D0               | 3 | 18,000 | B        |

Means that do not share a letter are significantly different.

## One-way ANOVA: d90 versus Soil temperature

### Method

Null hypothesis All means are equal  
Alternative hypothesis At least one mean is different  
Significance level  $\alpha = 0,05$

Equal variances were assumed for the analysis.

### Factor Information

| Factor           | Levels | Values     |
|------------------|--------|------------|
| Soil temperature | 3      | D0; D1; D2 |

### Analysis of Variance

| Source           | DF | Adj SS | Adj MS | F-Value | P-Value |
|------------------|----|--------|--------|---------|---------|
| Soil temperature | 2  | 2,000  | 1,000  | 0,71    | 0,531   |
| Error            | 6  | 8,500  | 1,417  |         |         |
| Total            | 8  | 10,500 |        |         |         |

### Model Summary

| S       | R-sq   | R-sq(adj) | R-sq(pred) |
|---------|--------|-----------|------------|
| 1,19024 | 19,05% | 0,00%     | 0,00%      |

### Means

| Soil temperature | N | Mean   | StDev | 95% CI           |
|------------------|---|--------|-------|------------------|
| D0               | 3 | 25,00  | 1,73  | ( 23,32; 26,68)  |
| D1               | 3 | 26,000 | 1,000 | (24,319; 27,681) |
| D2               | 3 | 26,000 | 0,500 | (24,319; 27,681) |

Pooled StDev = 1,19024

## Tukey Pairwise Comparisons

### Grouping Information Using the Tukey Method and 95% Confidence

| Soil temperature | N | Mean   | Grouping |
|------------------|---|--------|----------|
| D2               | 3 | 26,000 | A        |
| D1               | 3 | 26,000 | A        |
| D0               | 3 | 25,00  | A        |

Means that do not share a letter are significantly different.

## One-way ANOVA: d105 versus Soil temperature

### Method

Null hypothesis All means are equal  
Alternative hypothesis At least one mean is different  
Significance level  $\alpha = 0,05$

Equal variances were assumed for the analysis.

### Factor Information

| Factor           | Levels | Values     |
|------------------|--------|------------|
| Soil temperature | 3      | D0; D1; D2 |

### Analysis of Variance

| Source           | DF | Adj SS | Adj MS | F-Value | P-Value |
|------------------|----|--------|--------|---------|---------|
| Soil temperature | 2  | 8,000  | 4,000  | 2,82    | 0,137   |
| Error            | 6  | 8,500  | 1,417  |         |         |
| Total            | 8  | 16,500 |        |         |         |

### Model Summary

| S       | R-sq   | R-sq(adj) | R-sq(pred) |
|---------|--------|-----------|------------|
| 1,19024 | 48,48% | 31,31%    | 0,00%      |

### Means

| Soil temperature | N | Mean   | StDev | 95% CI           |
|------------------|---|--------|-------|------------------|
| D0               | 3 | 32,00  | 1,73  | ( 30,32; 33,68)  |
| D1               | 3 | 34,000 | 0,500 | (32,319; 35,681) |
| D2               | 3 | 34,000 | 1,000 | (32,319; 35,681) |

Pooled StDev = 1,19024

## Tukey Pairwise Comparisons

### Grouping Information Using the Tukey Method and 95% Confidence

| Soil temperature | N | Mean   | Grouping |
|------------------|---|--------|----------|
| D2               | 3 | 34,000 | A        |
| D1               | 3 | 34,000 | A        |
| D0               | 3 | 32,00  | A        |

Means that do not share a letter are significantly different.



## One-way ANOVA: d120 versus Soil temperature

### Method

Null hypothesis All means are equal  
Alternative hypothesis At least one mean is different  
Significance level  $\alpha = 0,05$

Equal variances were assumed for the analysis.

### Factor Information

| Factor           | Levels | Values     |
|------------------|--------|------------|
| Soil temperature | 3      | D0; D1; D2 |

### Analysis of Variance

| Source           | DF | Adj SS | Adj MS | F-Value | P-Value |
|------------------|----|--------|--------|---------|---------|
| Soil temperature | 2  | 18,00  | 9,000  | 4,50    | 0,064   |
| Error            | 6  | 12,00  | 2,000  |         |         |
| Total            | 8  | 30,00  |        |         |         |

### Model Summary

| S       | R-sq   | R-sq(adj) | R-sq(pred) |
|---------|--------|-----------|------------|
| 1,41421 | 60,00% | 46,67%    | 10,00%     |

### Means

| Soil temperature | N | Mean   | StDev | 95% CI           |
|------------------|---|--------|-------|------------------|
| D0               | 3 | 35,000 | 1,000 | (33,002; 36,998) |
| D1               | 3 | 38,00  | 2,00  | ( 36,00; 40,00)  |
| D2               | 3 | 38,000 | 1,000 | (36,002; 39,998) |

Pooled StDev = 1,41421

## Tukey Pairwise Comparisons

### Grouping Information Using the Tukey Method and 95% Confidence

| Soil temperature | N | Mean   | Grouping |
|------------------|---|--------|----------|
| D2               | 3 | 38,000 | A        |
| D1               | 3 | 38,00  | A        |
| D0               | 3 | 35,000 | A        |

Means that do not share a letter are significantly different.

## One-way ANOVA: d165 versus Soil temperature

### Method

Null hypothesis All means are equal  
Alternative hypothesis At least one mean is different  
Significance level  $\alpha = 0,05$

Equal variances were assumed for the analysis.

### Factor Information

| Factor           | Levels | Values     |
|------------------|--------|------------|
| Soil temperature | 3      | D0; D1; D2 |

### Analysis of Variance

| Source           | DF | Adj SS | Adj MS | F-Value | P-Value |
|------------------|----|--------|--------|---------|---------|
| Soil temperature | 2  | 26,00  | 13,000 | 3,55    | 0,096   |
| Error            | 6  | 22,00  | 3,667  |         |         |
| Total            | 8  | 48,00  |        |         |         |

### Model Summary

| S       | R-sq   | R-sq(adj) | R-sq(pred) |
|---------|--------|-----------|------------|
| 1,91485 | 54,17% | 38,89%    | 0,00%      |

### Means

| Soil temperature | N | Mean   | StDev | 95% CI           |
|------------------|---|--------|-------|------------------|
| D0               | 3 | 25,000 | 1,000 | (22,295; 27,705) |
| D1               | 3 | 28,000 | 1,000 | (25,295; 30,705) |
| D2               | 3 | 29,00  | 3,00  | ( 26,29; 31,71)  |

Pooled StDev = 1,91485

## Tukey Pairwise Comparisons

### Grouping Information Using the Tukey Method and 95% Confidence

| Soil temperature | N | Mean   | Grouping |
|------------------|---|--------|----------|
| D2               | 3 | 29,00  | A        |
| D1               | 3 | 28,000 | A        |
| D0               | 3 | 25,000 | A        |

Means that do not share a letter are significantly different.

## One-way ANOVA: d180 versus Soil temperature

### Method

Null hypothesis All means are equal  
Alternative hypothesis At least one mean is different  
Significance level  $\alpha = 0,05$

Equal variances were assumed for the analysis.

### Factor Information

| Factor           | Levels | Values     |
|------------------|--------|------------|
| Soil temperature | 3      | D0; D1; D2 |

### Analysis of Variance

| Source           | DF | Adj SS | Adj MS | F-Value | P-Value |
|------------------|----|--------|--------|---------|---------|
| Soil temperature | 2  | 18,00  | 9,000  | 2,25    | 0,187   |
| Error            | 6  | 24,00  | 4,000  |         |         |
| Total            | 8  | 42,00  |        |         |         |

### Model Summary

| S | R-sq   | R-sq(adj) | R-sq(pred) |
|---|--------|-----------|------------|
| 2 | 42,86% | 23,81%    | 0,00%      |

### Means

| Soil temperature | N | Mean   | StDev | 95% CI           |
|------------------|---|--------|-------|------------------|
| D0               | 3 | 19,00  | 2,65  | ( 16,17; 21,83)  |
| D1               | 3 | 19,000 | 1,000 | (16,175; 21,825) |
| D2               | 3 | 22,00  | 2,00  | ( 19,17; 24,83)  |

Pooled StDev = 2

## Tukey Pairwise Comparisons

### Grouping Information Using the Tukey Method and 95% Confidence

| Soil temperature | N | Mean   | Grouping |
|------------------|---|--------|----------|
| D2               | 3 | 22,00  | A        |
| D1               | 3 | 19,000 | A        |
| D0               | 3 | 19,00  | A        |

Means that do not share a letter are significantly different.

## Soil moisture (%)

### One-way ANOVA: : d0 versus Soil moisture (%)

#### Method

Null hypothesis All means are equal  
Alternative hypothesis At least one mean is different  
Significance level  $\alpha = 0,05$

Equal variances were assumed for the analysis.

#### Factor Information

| Factor        | Levels | Values     |
|---------------|--------|------------|
| Soil moisture | 3      | D0; D1; D2 |

#### Analysis of Variance

| Source        | DF | Adj SS   | Adj MS   | F-Value | P-Value |
|---------------|----|----------|----------|---------|---------|
| Soil moisture | 2  | 0,000000 | 0,000000 | 0,00    | 1,000   |
| Error         | 6  | 0,060000 | 0,010000 |         |         |
| Total         | 8  | 0,060000 |          |         |         |

#### Model Summary

| S   | R-sq  | R-sq(adj) | R-sq(pred) |
|-----|-------|-----------|------------|
| 0,1 | 0,00% | 0,00%     | 0,00%      |

#### Means

| Soil moisture | N | Mean    | StDev  | 95% CI             |
|---------------|---|---------|--------|--------------------|
| D0            | 3 | 60,1000 | 0,1000 | (59,9587; 60,2413) |
| D1            | 3 | 60,1000 | 0,1000 | (59,9587; 60,2413) |
| D2            | 3 | 60,1000 | 0,1000 | (59,9587; 60,2413) |

Pooled StDev = 0,1

## Tukey Pairwise Comparisons

Grouping Information Using the Tukey Method and 95% Confidence

| Soil moisture | N | Mean    | Grouping |
|---------------|---|---------|----------|
| D2            | 3 | 60,1000 | A        |
| D1            | 3 | 60,1000 | A        |
| D0            | 3 | 60,1000 | A        |

Means that do not share a letter are significantly different.

## One-way ANOVA: : d15 versus Soil moisture (%)

### Method

Null hypothesis All means are equal  
Alternative hypothesis At least one mean is different  
Significance level  $\alpha = 0,05$

Equal variances were assumed for the analysis.

### Factor Information

| Factor             | Levels | Values     |
|--------------------|--------|------------|
| Time and treatment | 3      | D0; D1; D2 |

### Analysis of Variance

| Source             | DF | Adj SS | Adj MS | F-Value | P-Value |
|--------------------|----|--------|--------|---------|---------|
| Time and treatment | 2  | 70,417 | 35,209 | 30,64   | 0,001   |
| Error              | 6  | 6,895  | 1,149  |         |         |
| Total              | 8  | 77,312 |        |         |         |

### Model Summary

| S       | R-sq   | R-sq(adj) | R-sq(pred) |
|---------|--------|-----------|------------|
| 1,07199 | 91,08% | 88,11%    | 79,93%     |

### Means

| Time and treatment | N | Mean   | StDev | 95% CI           |
|--------------------|---|--------|-------|------------------|
| D0T15              | 3 | 25,233 | 1,168 | (23,719; 26,748) |
| D1T15              | 3 | 29,083 | 1,127 | (27,569; 30,598) |
| D2T15              | 3 | 32,067 | 0,902 | (30,552; 33,581) |

Pooled StDev = 1,07199

## Tukey Pairwise Comparisons

### Grouping Information Using the Tukey Method and 95% Confidence

| Time and treatment | N | Mean   | Grouping |
|--------------------|---|--------|----------|
| D2                 | 3 | 32,067 | A        |
| D1                 | 3 | 29,083 | B        |
| D0                 | 3 | 25,233 | C        |

Means that do not share a letter are significantly different.

## One-way ANOVA: : d30 versus Soil moisture (%)

Method

Null hypothesis All means are equal  
Alternative hypothesis At least one mean is different  
Significance level  $\alpha = 0,05$

Equal variances were assumed for the analysis.

Factor Information

| Factor             | Levels | Values     |
|--------------------|--------|------------|
| Time and treatment | 3      | D0; D1; D2 |

Analysis of Variance

| Source             | DF | Adj SS | Adj MS  | F-Value | P-Value |
|--------------------|----|--------|---------|---------|---------|
| Time and treatment | 2  | 23,067 | 11,5335 | 11,87   | 0,008   |
| Error              | 6  | 5,830  | 0,9717  |         |         |
| Total              | 8  | 28,897 |         |         |         |

Model Summary

| S        | R-sq   | R-sq(adj) | R-sq(pred) |
|----------|--------|-----------|------------|
| 0,985737 | 79,82% | 73,10%    | 54,61%     |

Means

| Time and treatment | N | Mean   | StDev | 95% CI           |
|--------------------|---|--------|-------|------------------|
| D0                 | 3 | 21,700 | 0,826 | (20,307; 23,093) |
| D1                 | 3 | 25,380 | 0,754 | (23,987; 26,773) |
| D2                 | 3 | 22,367 | 1,290 | (20,974; 23,759) |

Pooled StDev = 0,985737

## Tukey Pairwise Comparisons

Grouping Information Using the Tukey Method and 95% Confidence

| Time and treatment | N | Mean   | Grouping |
|--------------------|---|--------|----------|
| D1                 | 3 | 25,380 | A        |
| D2                 | 3 | 22,367 | B        |
| D0                 | 3 | 21,700 | B        |

Means that do not share a letter are significantly different.

## One-way ANOVA: : d45 versus Soil moisture (%)

Null hypothesis All means are equal  
Alternative hypothesis At least one mean is different  
Significance level  $\alpha = 0,05$

Equal variances were assumed for the analysis.

### Factor Information

| Factor             | Levels | Values     |
|--------------------|--------|------------|
| Time and treatment | 3      | D0; D1; D2 |

### Analysis of Variance

| Source             | DF | Adj SS | Adj MS  | F-Value | P-Value |
|--------------------|----|--------|---------|---------|---------|
| Time and treatment | 2  | 35,757 | 17,8786 | 22,69   | 0,002   |
| Error              | 6  | 4,728  | 0,7881  |         |         |
| Total              | 8  | 40,486 |         |         |         |

### Model Summary

| S        | R-sq   | R-sq(adj) | R-sq(pred) |
|----------|--------|-----------|------------|
| 0,887725 | 88,32% | 84,43%    | 73,72%     |

### Means

| Time and treatment | N | Mean   | StDev | 95% CI           |
|--------------------|---|--------|-------|------------------|
| D0                 | 3 | 20,750 | 1,048 | (19,496; 22,004) |
| D1                 | 3 | 25,567 | 1,007 | (24,313; 26,821) |
| D2                 | 3 | 22,467 | 0,503 | (21,213; 23,721) |

Pooled StDev = 0,887725

## Tukey Pairwise Comparisons

Grouping Information Using the Tukey Method and 95% Confidence

| Time and treatment | N | Mean   | Grouping |
|--------------------|---|--------|----------|
| D1                 | 3 | 25,567 | A        |
| D2                 | 3 | 22,467 | B        |
| D0                 | 3 | 20,750 | B        |

Means that do not share a letter are significantly different.

## One-way ANOVA: : d60 versus Soil moisture (%)

Null hypothesis                      All means are equal  
Alternative hypothesis      At least one mean is different  
Significance level               $\alpha = 0,05$

Equal variances were assumed for the analysis.

### Factor Information

| Factor             | Levels | Values     |
|--------------------|--------|------------|
| Time and treatment | 3      | D0; D1; D2 |

### Analysis of Variance

| Source             | DF | Adj SS | Adj MS | F-Value | P-Value |
|--------------------|----|--------|--------|---------|---------|
| Time and treatment | 2  | 41,27  | 20,634 | 10,76   | 0,010   |
| Error              | 6  | 11,51  | 1,918  |         |         |
| Total              | 8  | 52,78  |        |         |         |

### Model Summary

| S       | R-sq   | R-sq(adj) | R-sq(pred) |
|---------|--------|-----------|------------|
| 1,38484 | 78,20% | 70,93%    | 50,94%     |

### Means

| Time and treatment | N | Mean   | StDev | 95% CI           |
|--------------------|---|--------|-------|------------------|
| D0                 | 3 | 18,500 | 0,500 | (16,544; 20,456) |
| D1                 | 3 | 22,000 | 1,000 | (20,044; 23,956) |
| D2                 | 3 | 23,63  | 2,12  | ( 21,68; 25,59)  |

Pooled StDev = 1,38484

## Tukey Pairwise Comparisons

Grouping Information Using the Tukey Method and 95% Confidence

| Time and treatment | N | Mean   | Grouping |
|--------------------|---|--------|----------|
| D2                 | 3 | 23,63  | A        |
| D1                 | 3 | 22,000 | A        |
| D0                 | 3 | 18,500 | B        |

Means that do not share a letter are significantly different.



## One-way ANOVA: : d75 versus Soil moisture (%)

Null hypothesis All means are equal  
Alternative hypothesis At least one mean is different  
Significance level  $\alpha = 0,05$

Equal variances were assumed for the analysis.

### Factor Information

| Factor             | Levels | Values     |
|--------------------|--------|------------|
| Time and treatment | 3      | D0; D1; D2 |

### Analysis of Variance

| Source             | DF | Adj SS | Adj MS  | F-Value | P-Value |
|--------------------|----|--------|---------|---------|---------|
| Time and treatment | 2  | 66,374 | 33,1869 | 39,16   | 0,000   |
| Error              | 6  | 5,085  | 0,8475  |         |         |
| Total              | 8  | 71,459 |         |         |         |

### Model Summary

| S        | R-sq   | R-sq(adj) | R-sq(pred) |
|----------|--------|-----------|------------|
| 0,920598 | 92,88% | 90,51%    | 83,99%     |

### Means

| Time and treatment | N | Mean    | StDev  | 95% CI             |
|--------------------|---|---------|--------|--------------------|
| D0                 | 3 | 13,883  | 0,936  | ( 12,583; 15,184)  |
| D1                 | 3 | 17,0667 | 0,1155 | (15,7661; 18,3672) |
| D2                 | 3 | 20,533  | 1,286  | ( 19,233; 21,834)  |

Pooled StDev = 0,920598

## Tukey Pairwise Comparisons

Grouping Information Using the Tukey Method and 95% Confidence

| Time and treatment | N | Mean    | Grouping |
|--------------------|---|---------|----------|
| D2                 | 3 | 20,533  | A        |
| D1                 | 3 | 17,0667 | B        |
| D0                 | 3 | 13,883  | C        |

Means that do not share a letter are significantly different.

## One-way ANOVA: : d90 versus Soil moisture (%)

Null hypothesis All means are equal  
Alternative hypothesis At least one mean is different  
Significance level  $\alpha = 0,05$

Equal variances were assumed for the analysis.

### Factor Information

| Factor             | Levels | Values              |
|--------------------|--------|---------------------|
| Time and treatment | 3      | D0T90; D1T90; D2T90 |

### Analysis of Variance

| Source             | DF | Adj SS | Adj MS | F-Value | P-Value |
|--------------------|----|--------|--------|---------|---------|
| Time and treatment | 2  | 148,28 | 74,142 | 41,73   | 0,000   |
| Error              | 6  | 10,66  | 1,777  |         |         |
| Total              | 8  | 158,95 |        |         |         |

### Model Summary

| S       | R-sq   | R-sq(adj) | R-sq(pred) |
|---------|--------|-----------|------------|
| 1,33298 | 93,29% | 91,06%    | 84,91%     |

### Means

| Time and treatment | N | Mean   | StDev | 95% CI          |
|--------------------|---|--------|-------|-----------------|
| D0T90              | 3 | 4,237  | 1,045 | (2,354; 6,120)  |
| D1T90              | 3 | 14,13  | 1,85  | (12,24; 16,01)  |
| D2T90              | 3 | 10,067 | 0,902 | (8,184; 11,950) |

Pooled StDev = 1,33298

## Tukey Pairwise Comparisons

Grouping Information Using the Tukey Method and 95% Confidence

| Time and treatment | N | Mean   | Grouping |
|--------------------|---|--------|----------|
| D1T90              | 3 | 14,13  | A        |
| D2T90              | 3 | 10,067 | B        |
| D0T90              | 3 | 4,237  | C        |

Means that do not share a letter are significantly different.

## One-way ANOVA: : d105 versus Soil moisture (%)

Null hypothesis All means are equal  
Alternative hypothesis At least one mean is different  
Significance level  $\alpha = 0,05$

Equal variances were assumed for the analysis.

### Factor Information

| Factor             | Levels | Values     |
|--------------------|--------|------------|
| Time and treatment | 3      | D0; D1; D2 |

### Analysis of Variance

| Source             | DF | Adj SS | Adj MS | F-Value | P-Value |
|--------------------|----|--------|--------|---------|---------|
| Time and treatment | 2  | 4,147  | 2,074  | 1,54    | 0,288   |
| Error              | 6  | 8,066  | 1,344  |         |         |
| Total              | 8  | 12,214 |        |         |         |

### Model Summary

| S       | R-sq   | R-sq(adj) | R-sq(pred) |
|---------|--------|-----------|------------|
| 1,15948 | 33,96% | 11,94%    | 0,00%      |

### Means

| Time and treatment | N | Mean   | StDev | 95% CI           |
|--------------------|---|--------|-------|------------------|
| D0                 | 3 | 12,187 | 0,315 | (10,549; 13,825) |
| D1                 | 3 | 10,583 | 1,665 | ( 8,945; 12,221) |
| D2                 | 3 | 11,767 | 1,079 | (10,129; 13,405) |

Pooled StDev = 1,15948

## Tukey Pairwise Comparisons

Grouping Information Using the Tukey Method and 95% Confidence

| Time and treatment | N | Mean   | Grouping |
|--------------------|---|--------|----------|
| D0                 | 3 | 12,187 | A        |
| D2                 | 3 | 11,767 | A        |
| D1                 | 3 | 10,583 | A        |

Means that do not share a letter are significantly different.

## One-way ANOVA: : d120 versus Soil moisture (%)

Null hypothesis All means are equal  
Alternative hypothesis At least one mean is different  
Significance level  $\alpha = 0,05$

Equal variances were assumed for the analysis.

### Factor Information

| Factor             | Levels | Values     |
|--------------------|--------|------------|
| Time and treatment | 3      | D0; D1; D2 |

### Analysis of Variance

| Source             | DF | Adj SS | Adj MS | F-Value | P-Value |
|--------------------|----|--------|--------|---------|---------|
| Time and treatment | 2  | 7,226  | 3,6129 | 8,58    | 0,017   |
| Error              | 6  | 2,527  | 0,4212 |         |         |
| Total              | 8  | 9,753  |        |         |         |

### Model Summary

| S        | R-sq   | R-sq(adj) | R-sq(pred) |
|----------|--------|-----------|------------|
| 0,648965 | 74,09% | 65,45%    | 41,70%     |

### Means

| Time and treatment | N | Mean   | StDev | 95% CI           |
|--------------------|---|--------|-------|------------------|
| D0                 | 3 | 11,567 | 0,666 | (10,650; 12,483) |
| D1                 | 3 | 11,173 | 0,755 | (10,257; 12,090) |
| D2                 | 3 | 9,500  | 0,500 | ( 8,583; 10,417) |

Pooled StDev = 0,648965

## Tukey Pairwise Comparisons

Grouping Information Using the Tukey Method and 95% Confidence

| Time and treatment | N | Mean   | Grouping |
|--------------------|---|--------|----------|
| D0                 | 3 | 11,567 | A        |
| D1                 | 3 | 11,173 | A        |
| D2                 | 3 | 9,500  | B        |

Means that do not share a letter are significantly different.

## One-way ANOVA: : d165 versus Soil moisture (%)

Null hypothesis All means are equal  
Alternative hypothesis At least one mean is different  
Significance level  $\alpha = 0,05$

Equal variances were assumed for the analysis.

### Factor Information

| Factor             | Levels | Values        |
|--------------------|--------|---------------|
| Time and treatment | 3      | D0T; D1T; D2T |

### Analysis of Variance

| Source             | DF | Adj SS | Adj MS | F-Value | P-Value |
|--------------------|----|--------|--------|---------|---------|
| Time and treatment | 2  | 12,494 | 6,247  | 4,71    | 0,059   |
| Error              | 6  | 7,955  | 1,326  |         |         |
| Total              | 8  | 20,449 |        |         |         |

### Model Summary

| S       | R-sq   | R-sq(adj) | R-sq(pred) |
|---------|--------|-----------|------------|
| 1,15145 | 61,10% | 48,13%    | 12,47%     |

### Means

| Time and treatment | N | Mean   | StDev | 95% CI           |
|--------------------|---|--------|-------|------------------|
| D0                 | 3 | 23,717 | 0,375 | (22,090; 25,343) |
| D1                 | 3 | 24,33  | 1,89  | ( 22,71; 25,96)  |
| D2                 | 3 | 26,467 | 0,503 | (24,840; 28,093) |

Pooled StDev = 1,15145

## Tukey Pairwise Comparisons

Grouping Information Using the Tukey Method and 95% Confidence

| Time and treatment | N | Mean   | Grouping |
|--------------------|---|--------|----------|
| D2                 | 3 | 26,467 | A        |
| D1                 | 3 | 24,33  | A        |
| D0                 | 3 | 23,717 | A        |

Means that do not share a letter are significantly different.

## One-way ANOVA: : d180 versus Soil moisture (%) Method

Null hypothesis All means are equal  
Alternative hypothesis At least one mean is different  
Significance level  $\alpha = 0,05$

Equal variances were assumed for the analysis.

### Factor Information

| Factor             | Levels | Values     |
|--------------------|--------|------------|
| Time and treatment | 3      | D0; D1; D2 |

### Analysis of Variance

| Source             | DF | Adj SS | Adj MS  | F-Value | P-Value |
|--------------------|----|--------|---------|---------|---------|
| Time and treatment | 2  | 46,085 | 23,0425 | 25,82   | 0,001   |
| Error              | 6  | 5,355  | 0,8925  |         |         |
| Total              | 8  | 51,440 |         |         |         |

### Model Summary

| S        | R-sq   | R-sq(adj) | R-sq(pred) |
|----------|--------|-----------|------------|
| 0,944722 | 89,59% | 86,12%    | 76,58%     |

### Means

| Time and treatment | N | Mean   | StDev | 95% CI           |
|--------------------|---|--------|-------|------------------|
| D0                 | 3 | 20,283 | 1,005 | (18,949; 21,618) |
| D1                 | 3 | 22,133 | 0,231 | (20,799; 23,468) |
| D2                 | 3 | 25,733 | 1,270 | (24,399; 27,068) |

Pooled StDev = 0,944722

## Tukey Pairwise Comparisons

Grouping Information Using the Tukey Method and 95% Confidence

| Time and treatment | N | Mean   | Grouping |
|--------------------|---|--------|----------|
| D2                 | 3 | 25,733 | A        |
| D1                 | 3 | 22,133 | B        |
| D0                 | 3 | 20,283 | B        |

Means that do not share a letter are significantly different.

pH

## One-way ANOVA: d0 versus pH

### Method

Null hypothesis All means are equal  
Alternative hypothesis At least one mean is different  
Significance level  $\alpha = 0,05$

Equal variances were assumed for the analysis.

### Factor Information

| Factor | Levels | Values     |
|--------|--------|------------|
| pH     | 3      | D0; D1; D2 |

### Analysis of Variance

| Source | DF | Adj SS | Adj MS  | F-Value | P-Value |
|--------|----|--------|---------|---------|---------|
| pH     | 2  | 0,3548 | 0,17741 | 2,21    | 0,191   |
| Error  | 6  | 0,4821 | 0,08036 |         |         |
| Total  | 8  | 0,8370 |         |         |         |

### Model Summary

| S        | R-sq   | R-sq(adj) | R-sq(pred) |
|----------|--------|-----------|------------|
| 0,283471 | 42,39% | 23,19%    | 0,00%      |

### Means

| pH | N | Mean   | StDev  | 95% CI           |
|----|---|--------|--------|------------------|
| D0 | 3 | 8,7267 | 0,0503 | (8,3262; 9,1271) |
| D1 | 3 | 8,280  | 0,242  | ( 7,880; 8,680)  |
| D2 | 3 | 8,337  | 0,424  | ( 7,936; 8,737)  |

Pooled StDev = 0,283471

## Tukey Pairwise Comparisons

### Grouping Information Using the Tukey Method and 95% Confidence

| pH | N | Mean   | Grouping |
|----|---|--------|----------|
| D0 | 3 | 8,7267 | A        |
| D2 | 3 | 8,337  | A        |
| D1 | 3 | 8,280  | A        |

Means that do not share a letter are significantly different.

## One-way ANOVA: d15 versus pH

### Method

Null hypothesis All means are equal  
Alternative hypothesis At least one mean is different  
Significance level  $\alpha = 0,05$

Equal variances were assumed for the analysis.

### Factor Information

| Factor | Levels | Values     |
|--------|--------|------------|
| pH     | 3      | D0; D1; D2 |

### Analysis of Variance

| Source | DF | Adj SS  | Adj MS   | F-Value | P-Value |
|--------|----|---------|----------|---------|---------|
| pH     | 2  | 0,11962 | 0,059811 | 8,50    | 0,018   |
| Error  | 6  | 0,04220 | 0,007033 |         |         |
| Total  | 8  | 0,16182 |          |         |         |

### Model Summary

| S         | R-sq   | R-sq(adj) | R-sq(pred) |
|-----------|--------|-----------|------------|
| 0,0838650 | 73,92% | 65,23%    | 41,32%     |

### Means

| pH | N | Mean   | StDev  | 95% CI           |
|----|---|--------|--------|------------------|
| D0 | 3 | 7,2433 | 0,0862 | (7,1249; 7,3618) |
| D1 | 3 | 7,4633 | 0,0929 | (7,3449; 7,5818) |
| D2 | 3 | 7,5067 | 0,0709 | (7,3882; 7,6251) |

Pooled StDev = 0,0838650

## Tukey Pairwise Comparisons

### Grouping Information Using the Tukey Method and 95% Confidence

| pH | N | Mean   | Grouping |
|----|---|--------|----------|
| D2 | 3 | 7,5067 | A        |
| D1 | 3 | 7,4633 | A        |
| D0 | 3 | 7,2433 | B        |

Means that do not share a letter are significantly different.



## One-way ANOVA: d30 versus pH

### Method

Null hypothesis All means are equal  
Alternative hypothesis At least one mean is different  
Significance level  $\alpha = 0,05$

Equal variances were assumed for the analysis.

### Factor Information

| Factor | Levels | Values     |
|--------|--------|------------|
| pH     | 3      | D0; D1; D2 |

### Analysis of Variance

| Source | DF | Adj SS   | Adj MS   | F-Value | P-Value |
|--------|----|----------|----------|---------|---------|
| pH     | 2  | 0,092867 | 0,046433 | 36,03   | 0,000   |
| Error  | 6  | 0,007733 | 0,001289 |         |         |
| Total  | 8  | 0,100600 |          |         |         |

### Model Summary

| S         | R-sq   | R-sq(adj) | R-sq(pred) |
|-----------|--------|-----------|------------|
| 0,0359011 | 92,31% | 89,75%    | 82,70%     |

### Means

| pH | N | Mean   | StDev  | 95% CI           |
|----|---|--------|--------|------------------|
| D0 | 3 | 7,3933 | 0,0306 | (7,3426; 7,4441) |
| D1 | 3 | 7,6167 | 0,0503 | (7,5659; 7,6674) |
| D2 | 3 | 7,6000 | 0,0200 | (7,5493; 7,6507) |

Pooled StDev = 0,0359011

## Tukey Pairwise Comparisons

### Grouping Information Using the Tukey Method and 95% Confidence

| pH | N | Mean   | Grouping |
|----|---|--------|----------|
| D1 | 3 | 7,6167 | A        |
| D2 | 3 | 7,6000 | A        |
| D0 | 3 | 7,3933 | B        |

Means that do not share a letter are significantly different.

## Tukey Simultaneous 95% CIs

## One-way ANOVA: d45 versus pH

### Method

Null hypothesis All means are equal  
Alternative hypothesis At least one mean is different  
Significance level  $\alpha = 0,05$

Equal variances were assumed for the analysis.

### Factor Information

| Factor | Levels | Values     |
|--------|--------|------------|
| pH     | 3      | D0; D1; D2 |

### Analysis of Variance

| Source | DF | Adj SS  | Adj MS   | F-Value | P-Value |
|--------|----|---------|----------|---------|---------|
| pH     | 2  | 0,10500 | 0,052500 | 13,94   | 0,006   |
| Error  | 6  | 0,02260 | 0,003767 |         |         |
| Total  | 8  | 0,12760 |          |         |         |

### Model Summary

| S         | R-sq   | R-sq(adj) | R-sq(pred) |
|-----------|--------|-----------|------------|
| 0,0613732 | 82,29% | 76,38%    | 60,15%     |

### Means

| pH | N | Mean   | StDev  | 95% CI           |
|----|---|--------|--------|------------------|
| D0 | 3 | 7,3467 | 0,0808 | (7,2600; 7,4334) |
| D1 | 3 | 7,5967 | 0,0252 | (7,5100; 7,6834) |
| D2 | 3 | 7,5467 | 0,0643 | (7,4600; 7,6334) |

Pooled StDev = 0,0613732

## Tukey Pairwise Comparisons

### Grouping Information Using the Tukey Method and 95% Confidence

| pH | N | Mean   | Grouping |
|----|---|--------|----------|
| D1 | 3 | 7,5967 | A        |
| D2 | 3 | 7,5467 | A        |
| D0 | 3 | 7,3467 | B        |

Means that do not share a letter are significantly different.

## One-way ANOVA: d60 versus pH

### Method

Null hypothesis All means are equal  
Alternative hypothesis At least one mean is different  
Significance level  $\alpha = 0,05$

Equal variances were assumed for the analysis.

### Factor Information

| Factor | Levels | Values     |
|--------|--------|------------|
| pH     | 3      | D0; D1; D2 |

### Analysis of Variance

| Source | DF | Adj SS   | Adj MS   | F-Value | P-Value |
|--------|----|----------|----------|---------|---------|
| pH     | 2  | 0,126156 | 0,063078 | 39,15   | 0,000   |
| Error  | 6  | 0,009667 | 0,001611 |         |         |
| Total  | 8  | 0,135822 |          |         |         |

### Model Summary

| S         | R-sq   | R-sq(adj) | R-sq(pred) |
|-----------|--------|-----------|------------|
| 0,0401386 | 92,88% | 90,51%    | 83,99%     |

### Means

| pH | N | Mean    | StDev   | 95% CI             |
|----|---|---------|---------|--------------------|
| D0 | 3 | 8,7600  | 0,0656  | ( 8,7033; 8,8167)  |
| D1 | 3 | 8,61333 | 0,01528 | (8,55663; 8,67004) |
| D2 | 3 | 8,4700  | 0,0173  | ( 8,4133; 8,5267)  |

Pooled StDev = 0,0401386

## Tukey Pairwise Comparisons

### Grouping Information Using the Tukey Method and 95% Confidence

| pH | N | Mean    | Grouping |
|----|---|---------|----------|
| D0 | 3 | 8,7600  | A        |
| D1 | 3 | 8,61333 | B        |
| D2 | 3 | 8,4700  | C        |

Means that do not share a letter are significantly different.

## One-way ANOVA: d75 versus pH

### Method

Null hypothesis All means are equal  
Alternative hypothesis At least one mean is different  
Significance level  $\alpha = 0,05$

Equal variances were assumed for the analysis.

### Factor Information

| Factor | Levels | Values     |
|--------|--------|------------|
| pH     | 3      | D0; D1; D2 |

### Analysis of Variance

| Source | DF | Adj SS  | Adj MS   | F-Value | P-Value |
|--------|----|---------|----------|---------|---------|
| pH     | 2  | 0,50107 | 0,250533 | 95,54   | 0,000   |
| Error  | 6  | 0,01573 | 0,002622 |         |         |
| Total  | 8  | 0,51680 |          |         |         |

### Model Summary

| S         | R-sq   | R-sq(adj) | R-sq(pred) |
|-----------|--------|-----------|------------|
| 0,0512076 | 96,96% | 95,94%    | 93,15%     |

### Means

| pH | N | Mean   | StDev  | 95% CI           |
|----|---|--------|--------|------------------|
| D0 | 3 | 8,6733 | 0,0252 | (8,6010; 8,7457) |
| D1 | 3 | 8,6467 | 0,0451 | (8,5743; 8,7190) |
| D2 | 3 | 8,1600 | 0,0721 | (8,0877; 8,2323) |

Pooled StDev = 0,0512076

## Tukey Pairwise Comparisons

### Grouping Information Using the Tukey Method and 95% Confidence

| pH | N | Mean   | Grouping |
|----|---|--------|----------|
| D0 | 3 | 8,6733 | A        |
| D1 | 3 | 8,6467 | A        |
| D2 | 3 | 8,1600 | B        |

Means that do not share a letter are significantly different.

## One-way ANOVA: d90 versus pH

### Method

Null hypothesis All means are equal  
Alternative hypothesis At least one mean is different  
Significance level  $\alpha = 0,05$

Equal variances were assumed for the analysis.

### Factor Information

| Factor | Levels | Values     |
|--------|--------|------------|
| pH     | 3      | D0; D1; D2 |

### Analysis of Variance

| Source | DF | Adj SS   | Adj MS   | F-Value | P-Value |
|--------|----|----------|----------|---------|---------|
| pH     | 2  | 0,008956 | 0,004478 | 0,81    | 0,488   |
| Error  | 6  | 0,033133 | 0,005522 |         |         |
| Total  | 8  | 0,042089 |          |         |         |

### Model Summary

| S         | R-sq   | R-sq(adj) | R-sq(pred) |
|-----------|--------|-----------|------------|
| 0,0743117 | 21,28% | 0,00%     | 0,00%      |

### Means

| pH | N | Mean   | StDev  | 95% CI           |
|----|---|--------|--------|------------------|
| D0 | 3 | 7,6233 | 0,1150 | (7,5184; 7,7283) |
| D1 | 3 | 7,6533 | 0,0462 | (7,5484; 7,7583) |
| D2 | 3 | 7,7000 | 0,0346 | (7,5950; 7,8050) |

Pooled StDev = 0,0743117

## Tukey Pairwise Comparisons

Grouping Information Using the Tukey Method and 95% Confidence

| pH | N | Mean   | Grouping |
|----|---|--------|----------|
| D2 | 3 | 7,7000 | A        |
| D1 | 3 | 7,6533 | A        |
| D0 | 3 | 7,6233 | A        |

Means that do not share a letter are significantly different.

## One-way ANOVA: d105 versus pH

### Method

Null hypothesis All means are equal  
Alternative hypothesis At least one mean is different  
Significance level  $\alpha = 0,05$

Equal variances were assumed for the analysis.

### Factor Information

| Factor | Levels | Values     |
|--------|--------|------------|
| pH     | 3      | D0; D1; D2 |

### Analysis of Variance

| Source | DF | Adj SS  | Adj MS  | F-Value | P-Value |
|--------|----|---------|---------|---------|---------|
| pH     | 2  | 0,09229 | 0,04614 | 3,44    | 0,101   |
| Error  | 6  | 0,08047 | 0,01341 |         |         |
| Total  | 8  | 0,17276 |         |         |         |

### Model Summary

| S        | R-sq   | R-sq(adj) | R-sq(pred) |
|----------|--------|-----------|------------|
| 0,115806 | 53,42% | 37,90%    | 0,00%      |

### Means

| pH | N | Mean   | StDev  | 95% CI           |
|----|---|--------|--------|------------------|
| D0 | 3 | 7,7600 | 0,0917 | (7,5964; 7,9236) |
| D1 | 3 | 7,6800 | 0,1587 | (7,5164; 7,8436) |
| D2 | 3 | 7,5167 | 0,0814 | (7,3531; 7,6803) |

Pooled StDev = 0,115806

## Tukey Pairwise Comparisons

### Grouping Information Using the Tukey Method and 95% Confidence

| pH | N | Mean   | Grouping |
|----|---|--------|----------|
| D0 | 3 | 7,7600 | A        |
| D1 | 3 | 7,6800 | A        |
| D2 | 3 | 7,5167 | A        |

Means that do not share a letter are significantly different.

## One-way ANOVA: d120 versus pH

### Method

Null hypothesis All means are equal  
Alternative hypothesis At least one mean is different  
Significance level  $\alpha = 0,05$

Equal variances were assumed for the analysis.

### Factor Information

| Factor | Levels | Values     |
|--------|--------|------------|
| pH     | 3      | D0; D1; D2 |

### Analysis of Variance

| Source | DF | Adj SS  | Adj MS  | F-Value | P-Value |
|--------|----|---------|---------|---------|---------|
| pH     | 2  | 0,09780 | 0,04890 | 4,41    | 0,066   |
| Error  | 6  | 0,06660 | 0,01110 |         |         |
| Total  | 8  | 0,16440 |         |         |         |

### Model Summary

| S        | R-sq   | R-sq(adj) | R-sq(pred) |
|----------|--------|-----------|------------|
| 0,105357 | 59,49% | 45,99%    | 8,85%      |

### Means

| pH | N | Mean   | StDev  | 95% CI           |
|----|---|--------|--------|------------------|
| D0 | 3 | 7,8000 | 0,1572 | (7,6512; 7,9488) |
| D1 | 3 | 7,5500 | 0,0361 | (7,4012; 7,6988) |
| D2 | 3 | 7,6300 | 0,0854 | (7,4812; 7,7788) |

Pooled StDev = 0,105357

## Tukey Pairwise Comparisons

### Grouping Information Using the Tukey Method and 95% Confidence

| pH | N | Mean   | Grouping |
|----|---|--------|----------|
| D0 | 3 | 7,8000 | A        |
| D2 | 3 | 7,6300 | A        |
| D1 | 3 | 7,5500 | A        |

Means that do not share a letter are significantly different.

## One-way ANOVA: d165 versus pH

### Method

Null hypothesis All means are equal  
Alternative hypothesis At least one mean is different  
Significance level  $\alpha = 0,05$

Equal variances were assumed for the analysis.

### Factor Information

| Factor | Levels | Values     |
|--------|--------|------------|
| pH     | 3      | D0; D1; D2 |

### Analysis of Variance

| Source | DF | Adj SS  | Adj MS   | F-Value | P-Value |
|--------|----|---------|----------|---------|---------|
| pH     | 2  | 0,05227 | 0,026133 | 6,78    | 0,029   |
| Error  | 6  | 0,02313 | 0,003856 |         |         |
| Total  | 8  | 0,07540 |          |         |         |

### Model Summary

| S         | R-sq   | R-sq(adj) | R-sq(pred) |
|-----------|--------|-----------|------------|
| 0,0620931 | 69,32% | 59,09%    | 30,97%     |

### Means

| pH | N | Mean   | StDev  | 95% CI           |
|----|---|--------|--------|------------------|
| D0 | 3 | 7,6167 | 0,1012 | (7,5289; 7,7044) |
| D1 | 3 | 7,7100 | 0,0265 | (7,6223; 7,7977) |
| D2 | 3 | 7,5233 | 0,0252 | (7,4356; 7,6111) |

Pooled StDev = 0,0620931

## Tukey Pairwise Comparisons

### Grouping Information Using the Tukey Method and 95% Confidence

| pH | N | Mean   | Grouping |
|----|---|--------|----------|
| D1 | 3 | 7,7100 | A        |
| D0 | 3 | 7,6167 | A B      |
| D2 | 3 | 7,5233 | B        |

Means that do not share a letter are significantly different.



## One-way ANOVA: d180 versus pH

### Method

Null hypothesis All means are equal  
Alternative hypothesis At least one mean is different  
Significance level  $\alpha = 0,05$

Equal variances were assumed for the analysis.

### Factor Information

| Factor | Levels | Values     |
|--------|--------|------------|
| pH     | 3      | D0; D1; D2 |

### Analysis of Variance

| Source | DF | Adj SS  | Adj MS  | F-Value | P-Value |
|--------|----|---------|---------|---------|---------|
| pH     | 2  | 0,06847 | 0,03423 | 1,33    | 0,332   |
| Error  | 6  | 0,15413 | 0,02569 |         |         |
| Total  | 8  | 0,22260 |         |         |         |

### Model Summary

| S        | R-sq   | R-sq(adj) | R-sq(pred) |
|----------|--------|-----------|------------|
| 0,160278 | 30,76% | 7,68%     | 0,00%      |

### Means

| pH | N | Mean   | StDev  | 95% CI           |
|----|---|--------|--------|------------------|
| D0 | 3 | 7,247  | 0,234  | ( 7,020; 7,473)  |
| D1 | 3 | 7,2500 | 0,1179 | (7,0236; 7,4764) |
| D2 | 3 | 7,0633 | 0,0929 | (6,8369; 7,2898) |

Pooled StDev = 0,160278

## Tukey Pairwise Comparisons

### Grouping Information Using the Tukey Method and 95% Confidence

| pH | N | Mean   | Grouping |
|----|---|--------|----------|
| D1 | 3 | 7,2500 | A        |
| D0 | 3 | 7,247  | A        |
| D2 | 3 | 7,0633 | A        |

Means that do not share a letter are significantly different.

**C%**

## One-way ANOVA: d0 versus C%

### Method

Null hypothesis All means are equal  
Alternative hypothesis At least one mean is different  
Significance level  $\alpha = 0,05$

Equal variances were assumed for the analysis.

### Factor Information

| Factor | Levels | Values     |
|--------|--------|------------|
| C%     | 3      | D0; D1; D2 |

### Analysis of Variance

| Source | DF | Adj SS   | Adj MS   | F-Value | P-Value |
|--------|----|----------|----------|---------|---------|
| C%     | 2  | 0,068664 | 0,034332 | *       | *       |
| Error  | 6  | 0,000000 | 0,000000 |         |         |
| Total  | 8  | 0,068664 |          |         |         |

### Model Summary

| S | R-sq    | R-sq(adj) | R-sq(pred) |
|---|---------|-----------|------------|
| 0 | 100,00% | 100,00%   | 100,00%    |

### Means

| C% | N | Mean   | StDev  | 95% CI           |
|----|---|--------|--------|------------------|
| D0 | 3 | 0,8721 | 0,0000 | (0,8721; 0,8721) |
| D1 | 3 | 0,9791 | 0,0000 | (0,9791; 0,9791) |
| D2 | 3 | 1,086  | 0,000  | ( 1,086; 1,086)  |

Pooled StDev = 0

## Tukey Pairwise Comparisons

Grouping Information Using the Tukey Method and 95% Confidence

| C% | N | Mean   | Grouping |
|----|---|--------|----------|
| D2 | 3 | 1,086  | A        |
| D1 | 3 | 0,9791 | B        |
| D0 | 3 | 0,8721 | C        |

Means that do not share a letter are significantly different.

## One-way ANOVA: d15 versus C%

Method

Null hypothesis All means are equal  
Alternative hypothesis At least one mean is different  
Significance level  $\alpha = 0,05$

Equal variances were assumed for the analysis.

Factor Information

| Factor | Levels | Values     |
|--------|--------|------------|
| C%     | 3      | D0; D1; D2 |

Analysis of Variance

| Source | DF | Adj SS  | Adj MS  | F-Value | P-Value |
|--------|----|---------|---------|---------|---------|
| C%     | 2  | 0,03606 | 0,01803 | 0,57    | 0,593   |
| Error  | 6  | 0,18920 | 0,03153 |         |         |
| Total  | 8  | 0,22526 |         |         |         |

Model Summary

| S        | R-sq   | R-sq(adj) | R-sq(pred) |
|----------|--------|-----------|------------|
| 0,177577 | 16,01% | 0,00%     | 0,00%      |

Means

| C% | N | Mean   | StDev  | 95% CI           |
|----|---|--------|--------|------------------|
| D0 | 3 | 0,952  | 0,195  | ( 0,701; 1,202)  |
| D1 | 3 | 0,876  | 0,231  | ( 0,625; 1,127)  |
| D2 | 3 | 0,7965 | 0,0581 | (0,5456; 1,0474) |

Pooled StDev = 0,177577

## Tukey Pairwise Comparisons

Grouping Information Using the Tukey Method and 95% Confidence

| C% | N | Mean   | Grouping |
|----|---|--------|----------|
| D0 | 3 | 0,952  | A        |
| D1 | 3 | 0,876  | A        |
| D2 | 3 | 0,7965 | A        |

Means that do not share a letter are significantly different.

## One-way ANOVA: d30 versus C%

### Method

Null hypothesis All means are equal  
Alternative hypothesis At least one mean is different  
Significance level  $\alpha = 0,05$

Equal variances were assumed for the analysis.

### Factor Information

| Factor | Levels | Values     |
|--------|--------|------------|
| C%     | 3      | D0; D1; D2 |

### Analysis of Variance

| Source | DF | Adj SS | Adj MS  | F-Value | P-Value |
|--------|----|--------|---------|---------|---------|
| C%     | 2  | 0,8307 | 0,41536 | 4,63    | 0,061   |
| Error  | 6  | 0,5383 | 0,08972 |         |         |
| Total  | 8  | 1,3691 |         |         |         |

### Model Summary

| S        | R-sq   | R-sq(adj) | R-sq(pred) |
|----------|--------|-----------|------------|
| 0,299536 | 60,68% | 47,57%    | 11,53%     |

### Means

| C% | N | Mean  | StDev | 95% CI         |
|----|---|-------|-------|----------------|
| D0 | 3 | 0,948 | 0,253 | (0,525; 1,371) |
| D1 | 3 | 1,320 | 0,365 | (0,897; 1,743) |
| D2 | 3 | 1,692 | 0,269 | (1,269; 2,115) |

Pooled StDev = 0,299536

## Tukey Pairwise Comparisons

### Grouping Information Using the Tukey Method and 95% Confidence

| C% | N | Mean  | Grouping |
|----|---|-------|----------|
| D2 | 3 | 1,692 | A        |
| D1 | 3 | 1,320 | A        |
| D0 | 3 | 0,948 | A        |

Means that do not share a letter are significantly different.

## One-way ANOVA: d45 versus C%

### Method

Null hypothesis All means are equal  
Alternative hypothesis At least one mean is different  
Significance level  $\alpha = 0,05$

Equal variances were assumed for the analysis.

### Factor Information

| Factor | Levels | Values     |
|--------|--------|------------|
| C%     | 3      | D0; D1; D2 |

### Analysis of Variance

| Source | DF | Adj SS | Adj MS  | F-Value | P-Value |
|--------|----|--------|---------|---------|---------|
| C%     | 2  | 0,6941 | 0,34705 | 18,15   | 0,003   |
| Error  | 6  | 0,1147 | 0,01912 |         |         |
| Total  | 8  | 0,8088 |         |         |         |

### Model Summary

| S        | R-sq   | R-sq(adj) | R-sq(pred) |
|----------|--------|-----------|------------|
| 0,138291 | 85,81% | 81,08%    | 68,08%     |

### Means

| C% | N | Mean   | StDev  | 95% CI           |
|----|---|--------|--------|------------------|
| D0 | 3 | 1,1589 | 0,1338 | (0,9635; 1,3543) |
| D1 | 3 | 1,453  | 0,174  | ( 1,258; 1,649)  |
| D2 | 3 | 1,8372 | 0,0952 | (1,6418; 2,0326) |

Pooled StDev = 0,138291

## Tukey Pairwise Comparisons

### Grouping Information Using the Tukey Method and 95% Confidence

| C% | N | Mean   | Grouping |
|----|---|--------|----------|
| D2 | 3 | 1,8372 | A        |
| D1 | 3 | 1,453  | B        |
| D0 | 3 | 1,1589 | B        |

Means that do not share a letter are significantly different.

## One-way ANOVA: d60 versus C%

### Method

Null hypothesis All means are equal  
Alternative hypothesis At least one mean is different  
Significance level  $\alpha = 0,05$

Equal variances were assumed for the analysis.

### Factor Information

| Factor | Levels | Values     |
|--------|--------|------------|
| C%     | 3      | D0; D1; D2 |

### Analysis of Variance

| Source | DF | Adj SS  | Adj MS  | F-Value | P-Value |
|--------|----|---------|---------|---------|---------|
| C%     | 2  | 0,03201 | 0,01600 | 0,43    | 0,669   |
| Error  | 6  | 0,22318 | 0,03720 |         |         |
| Total  | 8  | 0,25519 |         |         |         |

### Model Summary

| S        | R-sq   | R-sq(adj) | R-sq(pred) |
|----------|--------|-----------|------------|
| 0,192866 | 12,54% | 0,00%     | 0,00%      |

### Means

| C% | N | Mean   | StDev  | 95% CI           |
|----|---|--------|--------|------------------|
| D0 | 3 | 0,773  | 0,314  | ( 0,501; 1,046)  |
| D1 | 3 | 0,6279 | 0,0507 | (0,3554; 0,9004) |
| D2 | 3 | 0,6880 | 0,1021 | (0,4155; 0,9605) |

Pooled StDev = 0,192866

## Tukey Pairwise Comparisons

### Grouping Information Using the Tukey Method and 95% Confidence

| C% | N | Mean   | Grouping |
|----|---|--------|----------|
| D0 | 3 | 0,773  | A        |
| D2 | 3 | 0,6880 | A        |
| D1 | 3 | 0,6279 | A        |

Means that do not share a letter are significantly different.

## One-way ANOVA: d75 versus C%

### Method

Null hypothesis All means are equal  
Alternative hypothesis At least one mean is different  
Significance level  $\alpha = 0,05$

Equal variances were assumed for the analysis.

### Factor Information

| Factor | Levels | Values     |
|--------|--------|------------|
| C%     | 3      | D0; D1; D2 |

### Analysis of Variance

| Source | DF | Adj SS  | Adj MS   | F-Value | P-Value |
|--------|----|---------|----------|---------|---------|
| C%     | 2  | 0,01523 | 0,007617 | 0,20    | 0,822   |
| Error  | 6  | 0,22632 | 0,037719 |         |         |
| Total  | 8  | 0,24155 |          |         |         |

### Model Summary

| S        | R-sq  | R-sq(adj) | R-sq(pred) |
|----------|-------|-----------|------------|
| 0,194215 | 6,31% | 0,00%     | 0,00%      |

### Means

| C% | N | Mean   | StDev  | 95% CI            |
|----|---|--------|--------|-------------------|
| D0 | 3 | 0,341  | 0,236  | ( 0,067; 0,615)   |
| D1 | 3 | 0,291  | 0,233  | ( 0,016; 0,565)   |
| D2 | 3 | 0,2403 | 0,0597 | (-0,0341; 0,5147) |

Pooled StDev = 0,194215

## Tukey Pairwise Comparisons

### Grouping Information Using the Tukey Method and 95% Confidence

| C% | N | Mean   | Grouping |
|----|---|--------|----------|
| D0 | 3 | 0,341  | A        |
| D1 | 3 | 0,291  | A        |
| D2 | 3 | 0,2403 | A        |

Means that do not share a letter are significantly different.

## One-way ANOVA: d90 versus C%

### Method

Null hypothesis All means are equal  
Alternative hypothesis At least one mean is different  
Significance level  $\alpha = 0,05$

Equal variances were assumed for the analysis.

### Factor Information

| Factor | Levels | Values     |
|--------|--------|------------|
| C%     | 3      | D0; D1; D2 |

### Analysis of Variance

| Source | DF | Adj SS   | Adj MS   | F-Value | P-Value |
|--------|----|----------|----------|---------|---------|
| C%     | 2  | 0,003636 | 0,001818 | 0,18    | 0,839   |
| Error  | 6  | 0,060393 | 0,010066 |         |         |
| Total  | 8  | 0,064029 |          |         |         |

### Model Summary

| S        | R-sq  | R-sq(adj) | R-sq(pred) |
|----------|-------|-----------|------------|
| 0,100327 | 5,68% | 0,00%     | 0,00%      |

### Means

| C% | N | Mean   | StDev  | 95% CI           |
|----|---|--------|--------|------------------|
| D0 | 3 | 0,2946 | 0,0524 | (0,1528; 0,4363) |
| D1 | 3 | 0,3372 | 0,1628 | (0,1955; 0,4789) |
| D2 | 3 | 0,3372 | 0,0308 | (0,1955; 0,4789) |

Pooled StDev = 0,100327

## Tukey Pairwise Comparisons

### Grouping Information Using the Tukey Method and 95% Confidence

| C% | N | Mean   | Grouping |
|----|---|--------|----------|
| D2 | 3 | 0,3372 | A        |
| D1 | 3 | 0,3372 | A        |
| D0 | 3 | 0,2946 | A        |

Means that do not share a letter are significantly different.



## One-way ANOVA: d105 versus C%

### Method

Null hypothesis All means are equal  
Alternative hypothesis At least one mean is different  
Significance level  $\alpha = 0,05$

Equal variances were assumed for the analysis.

### Factor Information

| Factor | Levels | Values     |
|--------|--------|------------|
| C%     | 3      | D0; D1; D2 |

### Analysis of Variance

| Source | DF | Adj SS   | Adj MS   | F-Value | P-Value |
|--------|----|----------|----------|---------|---------|
| C%     | 2  | 0,014745 | 0,007373 | 6,46    | 0,032   |
| Error  | 6  | 0,006851 | 0,001142 |         |         |
| Total  | 8  | 0,021596 |          |         |         |

### Model Summary

| S         | R-sq   | R-sq(adj) | R-sq(pred) |
|-----------|--------|-----------|------------|
| 0,0337899 | 68,28% | 57,70%    | 28,63%     |

### Means

| C% | N | Mean    | StDev   | 95% CI             |
|----|---|---------|---------|--------------------|
| D0 | 3 | 0,2946  | 0,0553  | ( 0,2468; 0,3423)  |
| D1 | 3 | 0,33721 | 0,01163 | (0,28947; 0,38495) |
| D2 | 3 | 0,23837 | 0,01538 | (0,19064; 0,28611) |

Pooled StDev = 0,0337899

## Tukey Pairwise Comparisons

### Grouping Information Using the Tukey Method and 95% Confidence

| C% | N | Mean    | Grouping |
|----|---|---------|----------|
| D1 | 3 | 0,33721 | A        |
| D0 | 3 | 0,2946  | A B      |
| D2 | 3 | 0,23837 | B        |

Means that do not share a letter are significantly different.

## One-way ANOVA: d120 versus C%

### Method

Null hypothesis All means are equal  
Alternative hypothesis At least one mean is different  
Significance level  $\alpha = 0,05$

Equal variances were assumed for the analysis.

### Factor Information

C% 3 D0; D1; D2

### Analysis of Variance

| Source | DF | Adj SS   | Adj MS   | F-Value | P-Value |
|--------|----|----------|----------|---------|---------|
| C%     | 2  | 0,000008 | 0,000004 | 0,01    | 0,995   |
| Error  | 6  | 0,004214 | 0,000702 |         |         |
| Total  | 8  | 0,004222 |          |         |         |

### Model Summary

| S         | R-sq  | R-sq(adj) | R-sq(pred) |
|-----------|-------|-----------|------------|
| 0,0265015 | 0,18% | 0,00%     | 0,00%      |

### Means

| C% | N | Mean   | StDev  | 95% CI           |
|----|---|--------|--------|------------------|
| D0 | 3 | 0,2907 | 0,0266 | (0,2533; 0,3281) |
| D1 | 3 | 0,2907 | 0,0266 | (0,2533; 0,3281) |
| D2 | 3 | 0,2926 | 0,0262 | (0,2552; 0,3301) |

Pooled StDev = 0,0265015

## Tukey Pairwise Comparisons

Grouping Information Using the Tukey Method and 95% Confidence

| C% | N | Mean   | Grouping |
|----|---|--------|----------|
| D2 | 3 | 0,2926 | A        |
| D1 | 3 | 0,2907 | A        |
| D0 | 3 | 0,2907 | A        |

Means that do not share a letter are significantly different.

## One-way ANOVA: d165 versus C%

### Method

Null hypothesis All means are equal  
Alternative hypothesis At least one mean is different  
Significance level  $\alpha = 0,05$

Equal variances were assumed for the analysis.

### Factor Information

| Factor | Levels | Values     |
|--------|--------|------------|
| C%     | 3      | D0; D1; D2 |

### Analysis of Variance

| Source | DF | Adj SS   | Adj MS   | F-Value | P-Value |
|--------|----|----------|----------|---------|---------|
| C%     | 2  | 0,099746 | 0,049873 | 81,47   | 0,000   |
| Error  | 6  | 0,003673 | 0,000612 |         |         |
| Total  | 8  | 0,103419 |          |         |         |

### Model Summary

| S         | R-sq   | R-sq(adj) | R-sq(pred) |
|-----------|--------|-----------|------------|
| 0,0247425 | 96,45% | 95,26%    | 92,01%     |

### Means

| C% | N | Mean    | StDev   | 95% CI             |
|----|---|---------|---------|--------------------|
| D0 | 3 | 0,3391  | 0,0220  | ( 0,3042; 0,3741)  |
| D1 | 3 | 0,3837  | 0,0349  | ( 0,3488; 0,4187)  |
| D2 | 3 | 0,58140 | 0,01163 | (0,54644; 0,61635) |

Pooled StDev = 0,0247425

## Tukey Pairwise Comparisons

Grouping Information Using the Tukey Method and 95% Confidence

| C% | N | Mean    | Grouping |
|----|---|---------|----------|
| D2 | 3 | 0,58140 | A        |
| D1 | 3 | 0,3837  | B        |
| D0 | 3 | 0,3391  | B        |

Means that do not share a letter are significantly different.

## One-way ANOVA: d180 versus C%

### Method

Null hypothesis All means are equal  
Alternative hypothesis At least one mean is different  
Significance level  $\alpha = 0,05$

Equal variances were assumed for the analysis.

### Factor Information

| Factor | Levels | Values     |
|--------|--------|------------|
| C%     | 3      | D0; D1; D2 |

### Analysis of Variance

| Source | DF | Adj SS  | Adj MS  | F-Value | P-Value |
|--------|----|---------|---------|---------|---------|
| C%     | 2  | 0,05747 | 0,02874 | 2,08    | 0,206   |
| Error  | 6  | 0,08304 | 0,01384 |         |         |
| Total  | 8  | 0,14051 |         |         |         |

### Model Summary

| S        | R-sq   | R-sq(adj) | R-sq(pred) |
|----------|--------|-----------|------------|
| 0,117644 | 40,90% | 21,20%    | 0,00%      |

### Means

| C% | N | Mean   | StDev  | 95% CI           |
|----|---|--------|--------|------------------|
| D0 | 3 | 0,5310 | 0,1080 | (0,3648; 0,6972) |
| D1 | 3 | 0,6279 | 0,0465 | (0,4617; 0,7941) |
| D2 | 3 | 0,7267 | 0,1664 | (0,5605; 0,8929) |

Pooled StDev = 0,117644

## Tukey Pairwise Comparisons

### Grouping Information Using the Tukey Method and 95% Confidence

| C% | N | Mean   | Grouping |
|----|---|--------|----------|
| D2 | 3 | 0,7267 | A        |
| D1 | 3 | 0,6279 | A        |
| D0 | 3 | 0,5310 | A        |

Means that do not share a letter are significantly different.

N%

## One-way ANOVA: d0 versus N%

### Method

Null hypothesis All means are equal  
Alternative hypothesis At least one mean is different  
Significance level  $\alpha = 0,05$

Equal variances were assumed for the analysis.

### Factor Information

| Factor | Levels | Values     |
|--------|--------|------------|
| N%     | 3      | D0; D1; D2 |

### Analysis of Variance

| Source | DF | Adj SS   | Adj MS   | F-Value | P-Value |
|--------|----|----------|----------|---------|---------|
| N%     | 2  | 0,000001 | 0,000001 | *       | *       |
| Error  | 6  | 0,000000 | 0,000000 |         |         |
| Total  | 8  | 0,000001 |          |         |         |

### Model Summary

| S | R-sq    | R-sq(adj) | R-sq(pred) |
|---|---------|-----------|------------|
| 0 | 100,00% | 100,00%   | 100,00%    |

### Means

| N% | N | Mean     | StDev    | 95% CI               |
|----|---|----------|----------|----------------------|
| D0 | 3 | 0,003267 | 0,000000 | (0,003267; 0,003267) |
| D1 | 3 | 0,003711 | 0,000000 | (0,003711; 0,003711) |
| D2 | 3 | 0,004116 | 0,000000 | (0,004116; 0,004116) |

Pooled StDev = 0

## Tukey Pairwise Comparisons

### Grouping Information Using the Tukey Method and 95% Confidence

| N% | N | Mean     | Grouping |
|----|---|----------|----------|
| D2 | 3 | 0,004116 | A        |
| D1 | 3 | 0,003711 | B        |
| D0 | 3 | 0,003267 | C        |

Means that do not share a letter are significantly different.

## One-way ANOVA: d15 versus N%

### Method

Null hypothesis All means are equal  
Alternative hypothesis At least one mean is different  
Significance level  $\alpha = 0,05$

Equal variances were assumed for the analysis.

### Factor Information

| Factor | Levels | Values     |
|--------|--------|------------|
| N%     | 3      | D0; D1; D2 |

### Analysis of Variance

| Source | DF | Adj SS   | Adj MS   | F-Value | P-Value |
|--------|----|----------|----------|---------|---------|
| N%     | 2  | 0,000277 | 0,000139 | 26,00   | 0,001   |
| Error  | 6  | 0,000032 | 0,000005 |         |         |
| Total  | 8  | 0,000309 |          |         |         |

### Model Summary

| S         | R-sq   | R-sq(adj) | R-sq(pred) |
|-----------|--------|-----------|------------|
| 0,0023099 | 89,66% | 86,21%    | 76,72%     |

### Means

| N% | N | Mean     | StDev    | 95% CI               |
|----|---|----------|----------|----------------------|
| D0 | 3 | 0,004900 | 0,000000 | (0,001637; 0,008163) |
| D1 | 3 | 0,00817  | 0,00283  | ( 0,00490; 0,01143)  |
| D2 | 3 | 0,01797  | 0,00283  | ( 0,01470; 0,02123)  |

Pooled StDev = 0,00230988

## Tukey Pairwise Comparisons

### Grouping Information Using the Tukey Method and 95% Confidence

| N% | N | Mean     | Grouping |
|----|---|----------|----------|
| D2 | 3 | 0,01797  | A        |
| D1 | 3 | 0,00817  | B        |
| D0 | 3 | 0,004900 | B        |

Means that do not share a letter are significantly different.

## One-way ANOVA: d30 versus N%

### Method

Null hypothesis All means are equal  
Alternative hypothesis At least one mean is different  
Significance level  $\alpha = 0,05$

Equal variances were assumed for the analysis.

### Factor Information

| Factor | Levels | Values     |
|--------|--------|------------|
| N%     | 3      | D0; D1; D2 |

### Analysis of Variance

| Source | DF | Adj SS   | Adj MS   | F-Value | P-Value |
|--------|----|----------|----------|---------|---------|
| N%     | 2  | 0,002209 | 0,001104 | 29,98   | 0,001   |
| Error  | 6  | 0,000221 | 0,000037 |         |         |
| Total  | 8  | 0,002430 |          |         |         |

### Model Summary

| S         | R-sq   | R-sq(adj) | R-sq(pred) |
|-----------|--------|-----------|------------|
| 0,0060698 | 90,90% | 87,87%    | 79,53%     |

### Means

| N% | N | Mean    | StDev   | 95% CI              |
|----|---|---------|---------|---------------------|
| D0 | 3 | 0,00343 | 0,00255 | (-0,00514; 0,01200) |
| D1 | 3 | 0,01470 | 0,00000 | ( 0,00613; 0,02327) |
| D2 | 3 | 0,04083 | 0,01020 | ( 0,03226; 0,04941) |

Pooled StDev = 0,00606976

## Tukey Pairwise Comparisons

Grouping Information Using the Tukey Method and 95% Confidence

| N% | N | Mean    | Grouping |
|----|---|---------|----------|
| D2 | 3 | 0,04083 | A        |
| D1 | 3 | 0,01470 | B        |
| D0 | 3 | 0,00343 | B        |

Means that do not share a letter are significantly different.

## Tukey Simultaneous 95% CIs

## Interval Plot of d30 vs N%

## One-way ANOVA: d45 versus N%

### Method

Null hypothesis All means are equal  
Alternative hypothesis At least one mean is different  
Significance level  $\alpha = 0,05$

Equal variances were assumed for the analysis.

### Factor Information

| Factor | Levels | Values     |
|--------|--------|------------|
| N%     | 3      | D0; D1; D2 |

### Analysis of Variance

| Source | DF | Adj SS   | Adj MS   | F-Value | P-Value |
|--------|----|----------|----------|---------|---------|
| N%     | 2  | 0,000790 | 0,000395 | 29,60   | 0,001   |
| Error  | 6  | 0,000080 | 0,000013 |         |         |
| Total  | 8  | 0,000870 |          |         |         |

### Model Summary

| S         | R-sq   | R-sq(adj) | R-sq(pred) |
|-----------|--------|-----------|------------|
| 0,0036522 | 90,80% | 87,73%    | 79,29%     |

### Means

| N% | N | Mean     | StDev    | 95% CI                |
|----|---|----------|----------|-----------------------|
| D0 | 3 | 0,004900 | 0,000000 | (-0,000260; 0,010060) |
| D1 | 3 | 0,01797  | 0,00283  | ( 0,01281; 0,02313)   |
| D2 | 3 | 0,02777  | 0,00566  | ( 0,02261; 0,03293)   |

Pooled StDev = 0,00365224

## Tukey Pairwise Comparisons

### Grouping Information Using the Tukey Method and 95% Confidence

| N% | N | Mean     | Grouping |
|----|---|----------|----------|
| D2 | 3 | 0,02777  | A        |
| D1 | 3 | 0,01797  | B        |
| D0 | 3 | 0,004900 | C        |

Means that do not share a letter are significantly different.



## One-way ANOVA: d60 versus N%

### Method

Null hypothesis All means are equal  
Alternative hypothesis At least one mean is different  
Significance level  $\alpha = 0,05$

Equal variances were assumed for the analysis.

### Factor Information

| Factor | Levels | Values     |
|--------|--------|------------|
| N%     | 3      | D0; D1; D2 |

### Analysis of Variance

| Source | DF | Adj SS   | Adj MS   | F-Value | P-Value |
|--------|----|----------|----------|---------|---------|
| N%     | 2  | 0,000325 | 0,000163 | 20,33   | 0,002   |
| Error  | 6  | 0,000048 | 0,000008 |         |         |
| Total  | 8  | 0,000373 |          |         |         |

### Model Summary

| S         | R-sq   | R-sq(adj) | R-sq(pred) |
|-----------|--------|-----------|------------|
| 0,0028290 | 87,14% | 82,86%    | 71,07%     |

### Means

| N% | N | Mean    | StDev   | 95% CI             |
|----|---|---------|---------|--------------------|
| D0 | 3 | 0,01797 | 0,00283 | (0,01397; 0,02196) |
| D1 | 3 | 0,02613 | 0,00283 | (0,02214; 0,03013) |
| D2 | 3 | 0,03267 | 0,00283 | (0,02867; 0,03666) |

Pooled StDev = 0,00282902

## Tukey Pairwise Comparisons

### Grouping Information Using the Tukey Method and 95% Confidence

| N% | N | Mean    | Grouping |
|----|---|---------|----------|
| D2 | 3 | 0,03267 | A        |
| D1 | 3 | 0,02613 | A        |
| D0 | 3 | 0,01797 | B        |

Means that do not share a letter are significantly different.

## One-way ANOVA: d75 versus N%

### Method

Null hypothesis All means are equal  
Alternative hypothesis At least one mean is different  
Significance level  $\alpha = 0,05$

Equal variances were assumed for the analysis.

### Factor Information

| Factor | Levels | Values     |
|--------|--------|------------|
| N%     | 3      | D0; D1; D2 |

### Analysis of Variance

| Source | DF | Adj SS   | Adj MS   | F-Value | P-Value |
|--------|----|----------|----------|---------|---------|
| N%     | 2  | 0,000486 | 0,000243 | 30,33   | 0,001   |
| Error  | 6  | 0,000048 | 0,000008 |         |         |
| Total  | 8  | 0,000534 |          |         |         |

### Model Summary

| S         | R-sq   | R-sq(adj) | R-sq(pred) |
|-----------|--------|-----------|------------|
| 0,0028290 | 91,00% | 88,00%    | 79,75%     |

### Means

| N% | N | Mean    | StDev   | 95% CI             |
|----|---|---------|---------|--------------------|
| D0 | 3 | 0,01633 | 0,00283 | (0,01234; 0,02033) |
| D1 | 3 | 0,03103 | 0,00283 | (0,02704; 0,03503) |
| D2 | 3 | 0,03267 | 0,00283 | (0,02867; 0,03666) |

Pooled StDev = 0,00282902

## Tukey Pairwise Comparisons

Grouping Information Using the Tukey Method and 95% Confidence

| N% | N | Mean    | Grouping |
|----|---|---------|----------|
| D2 | 3 | 0,03267 | A        |
| D1 | 3 | 0,03103 | A        |
| D0 | 3 | 0,01633 | B        |

Means that do not share a letter are significantly different.

## One-way ANOVA: d90 versus N%

### Method

Null hypothesis All means are equal  
Alternative hypothesis At least one mean is different  
Significance level  $\alpha = 0,05$

Equal variances were assumed for the analysis.

### Factor Information

| Factor | Levels | Values     |
|--------|--------|------------|
| N%     | 3      | D0; D1; D2 |

### Analysis of Variance

| Source | DF | Adj SS   | Adj MS   | F-Value | P-Value |
|--------|----|----------|----------|---------|---------|
| N%     | 2  | 0,000005 | 0,000003 | 1,00    | 0,422   |
| Error  | 6  | 0,000016 | 0,000003 |         |         |
| Total  | 8  | 0,000021 |          |         |         |

### Model Summary

| S         | R-sq   | R-sq(adj) | R-sq(pred) |
|-----------|--------|-----------|------------|
| 0,0016333 | 25,00% | 0,00%     | 0,00%      |

### Means

| N% | N | Mean    | StDev   | 95% CI             |
|----|---|---------|---------|--------------------|
| D0 | 3 | 0,01307 | 0,00283 | (0,01076; 0,01537) |
| D1 | 3 | 0,01470 | 0,00000 | (0,01239; 0,01701) |
| D2 | 3 | 0,01470 | 0,00000 | (0,01239; 0,01701) |

Pooled StDev = 0,00163333

## Tukey Pairwise Comparisons

### Grouping Information Using the Tukey Method and 95% Confidence

| N% | N | Mean    | Grouping |
|----|---|---------|----------|
| D2 | 3 | 0,01470 | A        |
| D1 | 3 | 0,01470 | A        |
| D0 | 3 | 0,01307 | A        |

Means that do not share a letter are significantly different.

## One-way ANOVA: d105 versus N%

### Method

Null hypothesis All means are equal  
Alternative hypothesis At least one mean is different  
Significance level  $\alpha = 0,05$

Equal variances were assumed for the analysis.

### Factor Information

| Factor | Levels | Values     |
|--------|--------|------------|
| N%     | 3      | D0; D1; D2 |

### Analysis of Variance

| Source | DF | Adj SS   | Adj MS   | F-Value | P-Value |
|--------|----|----------|----------|---------|---------|
| N%     | 2  | 0,000005 | 0,000003 | 1,00    | 0,422   |
| Error  | 6  | 0,000016 | 0,000003 |         |         |
| Total  | 8  | 0,000021 |          |         |         |

### Model Summary

| S         | R-sq   | R-sq(adj) | R-sq(pred) |
|-----------|--------|-----------|------------|
| 0,0016333 | 25,00% | 0,00%     | 0,00%      |

### Means

| N% | N | Mean    | StDev   | 95% CI             |
|----|---|---------|---------|--------------------|
| D0 | 3 | 0,01307 | 0,00283 | (0,01076; 0,01537) |
| D1 | 3 | 0,01470 | 0,00000 | (0,01239; 0,01701) |
| D2 | 3 | 0,01470 | 0,00000 | (0,01239; 0,01701) |

Pooled StDev = 0,00163333

## Tukey Pairwise Comparisons

### Grouping Information Using the Tukey Method and 95% Confidence

| N% | N | Mean    | Grouping |
|----|---|---------|----------|
| D2 | 3 | 0,01470 | A        |
| D1 | 3 | 0,01470 | A        |
| D0 | 3 | 0,01307 | A        |

Means that do not share a letter are significantly different.

## One-way ANOVA: d120 versus N%

### Method

Null hypothesis All means are equal  
Alternative hypothesis At least one mean is different  
Significance level  $\alpha = 0,05$

Equal variances were assumed for the analysis.

### Factor Information

| Factor | Levels | Values     |
|--------|--------|------------|
| N%     | 3      | D0; D1; D2 |

### Analysis of Variance

| Source | DF | Adj SS   | Adj MS   | F-Value | P-Value |
|--------|----|----------|----------|---------|---------|
| N%     | 2  | 0,000005 | 0,000003 | 1,00    | 0,422   |
| Error  | 6  | 0,000016 | 0,000003 |         |         |
| Total  | 8  | 0,000021 |          |         |         |

### Model Summary

| S         | R-sq   | R-sq(adj) | R-sq(pred) |
|-----------|--------|-----------|------------|
| 0,0016333 | 25,00% | 0,00%     | 0,00%      |

### Means

| N% | N | Mean    | StDev   | 95% CI             |
|----|---|---------|---------|--------------------|
| D0 | 3 | 0,01307 | 0,00283 | (0,01076; 0,01537) |
| D1 | 3 | 0,01470 | 0,00000 | (0,01239; 0,01701) |
| D2 | 3 | 0,01470 | 0,00000 | (0,01239; 0,01701) |

Pooled StDev = 0,00163333

## Tukey Pairwise Comparisons

### Grouping Information Using the Tukey Method and 95% Confidence

| N% | N | Mean    | Grouping |
|----|---|---------|----------|
| D2 | 3 | 0,01470 | A        |
| D1 | 3 | 0,01470 | A        |
| D0 | 3 | 0,01307 | A        |

Means that do not share a letter are significantly different.

## One-way ANOVA: d165 versus N%

### Method

Null hypothesis All means are equal  
Alternative hypothesis At least one mean is different  
Significance level  $\alpha = 0,05$

Equal variances were assumed for the analysis.

### Factor Information

| Factor | Levels | Values     |
|--------|--------|------------|
| N%     | 3      | D0; D1; D2 |

### Analysis of Variance

| Source | DF | Adj SS   | Adj MS   | F-Value | P-Value |
|--------|----|----------|----------|---------|---------|
| N%     | 2  | 0,000101 | 0,000051 | 19,00   | 0,003   |
| Error  | 6  | 0,000016 | 0,000003 |         |         |
| Total  | 8  | 0,000117 |          |         |         |

### Model Summary

| S         | R-sq   | R-sq(adj) | R-sq(pred) |
|-----------|--------|-----------|------------|
| 0,0016333 | 86,36% | 81,82%    | 69,32%     |

### Means

| N% | N | Mean     | StDev    | 95% CI               |
|----|---|----------|----------|----------------------|
| D0 | 3 | 0,00653  | 0,00283  | ( 0,00423; 0,00884)  |
| D1 | 3 | 0,009800 | 0,000000 | (0,007493; 0,012107) |
| D2 | 3 | 0,01470  | 0,000000 | ( 0,01239; 0,01701)  |

Pooled StDev = 0,00163333

## Tukey Pairwise Comparisons

### Grouping Information Using the Tukey Method and 95% Confidence

| N% | N | Mean     | Grouping |
|----|---|----------|----------|
| D2 | 3 | 0,01470  | A        |
| D1 | 3 | 0,009800 | B        |
| D0 | 3 | 0,00653  | B        |

Means that do not share a letter are significantly different.

## One-way ANOVA: d180 versus N%

### Method

Null hypothesis All means are equal  
Alternative hypothesis At least one mean is different  
Significance level  $\alpha = 0,05$

Equal variances were assumed for the analysis.

### Factor Information

| Factor | Levels | Values     |
|--------|--------|------------|
| N%     | 3      | D0; D1; D2 |

### Analysis of Variance

| Source | DF | Adj SS   | Adj MS   | F-Value | P-Value |
|--------|----|----------|----------|---------|---------|
| N%     | 2  | 0,000069 | 0,000035 | 13,00   | 0,007   |
| Error  | 6  | 0,000016 | 0,000003 |         |         |
| Total  | 8  | 0,000085 |          |         |         |

### Model Summary

| S         | R-sq   | R-sq(adj) | R-sq(pred) |
|-----------|--------|-----------|------------|
| 0,0016333 | 81,25% | 75,00%    | 57,81%     |

### Means

| N% | N | Mean     | StDev    | 95% CI               |
|----|---|----------|----------|----------------------|
| D0 | 3 | 0,00817  | 0,00283  | ( 0,00586; 0,01047)  |
| D1 | 3 | 0,009800 | 0,000000 | (0,007493; 0,012107) |
| D2 | 3 | 0,01470  | 0,000000 | ( 0,01239; 0,01701)  |

Pooled StDev = 0,00163333

## Tukey Pairwise Comparisons

### Grouping Information Using the Tukey Method and 95% Confidence

| N% | N | Mean     | Grouping |
|----|---|----------|----------|
| D2 | 3 | 0,01470  | A        |
| D1 | 3 | 0,009800 | B        |
| D0 | 3 | 0,00817  | B        |

Means that do not share a letter are significantly different.

CN

## One-way ANOVA: d0 versus CN

### Method

Null hypothesis All means are equal  
Alternative hypothesis At least one mean is different  
Significance level  $\alpha = 0,05$

Equal variances were assumed for the analysis.

### Factor Information

| Factor | Levels | Values     |
|--------|--------|------------|
| CN     | 3      | D0; D1; D2 |

### Analysis of Variance

| Source | DF | Adj SS  | Adj MS  | F-Value | P-Value |
|--------|----|---------|---------|---------|---------|
| CN     | 2  | 54,0086 | 27,0043 | *       | *       |
| Error  | 6  | 0,0000  | 0,0000  |         |         |
| Total  | 8  | 54,0086 |         |         |         |

### Model Summary

| S | R-sq    | R-sq(adj) | R-sq(pred) |
|---|---------|-----------|------------|
| 0 | 100,00% | 100,00%   | 100,00%    |

### Means

| CN | N | Mean  | StDev | 95% CI         |
|----|---|-------|-------|----------------|
| D0 | 3 | 267,0 | 0,0   | (267,0; 267,0) |
| D1 | 3 | 263,8 | 0,0   | (263,8; 263,8) |
| D2 | 3 | 261,0 | 0,0   | (261,0; 261,0) |

Pooled StDev = 0

## Tukey Pairwise Comparisons

### Grouping Information Using the Tukey Method and 95% Confidence

| CN | N | Mean  | Grouping |
|----|---|-------|----------|
| D0 | 3 | 267,0 | A        |
| D1 | 3 | 263,8 | B        |
| D2 | 3 | 261,0 | C        |

Means that do not share a letter are significantly different.



## One-way ANOVA: d15 versus CN

### Method

Null hypothesis All means are equal  
Alternative hypothesis At least one mean is different  
Significance level  $\alpha = 0,05$

Equal variances were assumed for the analysis.

### Factor Information

| Factor | Levels | Values     |
|--------|--------|------------|
| CN     | 3      | D0; D1; D2 |

### Analysis of Variance

| Source | DF | Adj SS | Adj MS  | F-Value | P-Value |
|--------|----|--------|---------|---------|---------|
| CN     | 2  | 33658  | 16828,9 | 26,92   | 0,001   |
| Error  | 6  | 3751   | 625,2   |         |         |
| Total  | 8  | 37409  |         |         |         |

### Model Summary

| S       | R-sq   | R-sq(adj) | R-sq(pred) |
|---------|--------|-----------|------------|
| 25,0031 | 89,97% | 86,63%    | 77,44%     |

### Means

| CN | N | Mean   | StDev | 95% CI          |
|----|---|--------|-------|-----------------|
| D0 | 3 | 193,9  | 39,7  | (158,5; 229,2)  |
| D1 | 3 | 106,34 | 14,75 | (71,01; 141,66) |
| D2 | 3 | 44,82  | 8,82  | ( 9,50; 80,14)  |

Pooled StDev = 25,0031

## Tukey Pairwise Comparisons

### Grouping Information Using the Tukey Method and 95% Confidence

| CN | N | Mean   | Grouping |
|----|---|--------|----------|
| D0 | 3 | 193,9  | A        |
| D1 | 3 | 106,34 | B        |
| D2 | 3 | 44,82  | B        |

Means that do not share a letter are significantly different.

## One-way ANOVA: d30 versus CN

### Method

Null hypothesis All means are equal  
Alternative hypothesis At least one mean is different  
Significance level  $\alpha = 0,05$

Equal variances were assumed for the analysis.

### Factor Information

| Factor | Levels | Values     |
|--------|--------|------------|
| CN     | 3      | D0; D1; D2 |

### Analysis of Variance

| Source | DF | Adj SS | Adj MS  | F-Value | P-Value |
|--------|----|--------|---------|---------|---------|
| CN     | 2  | 92634  | 46317,2 | 239,26  | 0,000   |
| Error  | 6  | 1162   | 193,6   |         |         |
| Total  | 8  | 93796  |         |         |         |

### Model Summary

| S       | R-sq   | R-sq(adj) | R-sq(pred) |
|---------|--------|-----------|------------|
| 13,9136 | 98,76% | 98,35%    | 97,21%     |

### Means

| CN | N | Mean   | StDev | 95% CI           |
|----|---|--------|-------|------------------|
| D0 | 3 | 276,07 | 9,82  | (256,41; 295,73) |
| D1 | 3 | 87,4   | 20,9  | ( 67,8; 107,1)   |
| D2 | 3 | 41,64  | 6,95  | ( 21,98; 61,30)  |

Pooled StDev = 13,9136

## Tukey Pairwise Comparisons

### Grouping Information Using the Tukey Method and 95% Confidence

| CN | N | Mean   | Grouping |
|----|---|--------|----------|
| D0 | 3 | 276,07 | A        |
| D1 | 3 | 87,4   | B        |
| D2 | 3 | 41,64  | C        |

Means that do not share a letter are significantly different.

## One-way ANOVA: d45 versus CN

### Method

Null hypothesis All means are equal  
Alternative hypothesis At least one mean is different  
Significance level  $\alpha = 0,05$

Equal variances were assumed for the analysis.

### Factor Information

| Factor | Levels | Values     |
|--------|--------|------------|
| CN     | 3      | D0; D1; D2 |

### Analysis of Variance

| Source | DF | Adj SS | Adj MS  | F-Value | P-Value |
|--------|----|--------|---------|---------|---------|
| CN     | 2  | 54178  | 27088,9 | 80,46   | 0,000   |
| Error  | 6  | 2020   | 336,7   |         |         |
| Total  | 8  | 56198  |         |         |         |

### Model Summary

| S       | R-sq   | R-sq(adj) | R-sq(pred) |
|---------|--------|-----------|------------|
| 18,3489 | 96,41% | 95,21%    | 91,91%     |

### Means

| CN | N | Mean  | StDev | 95% CI          |
|----|---|-------|-------|-----------------|
| D0 | 3 | 236,5 | 27,3  | (210,6; 262,4)  |
| D1 | 3 | 80,41 | 6,43  | (54,49; 106,33) |
| D2 | 3 | 64,59 | 14,95 | (38,66; 90,51)  |

Pooled StDev = 18,3489

## Tukey Pairwise Comparisons

### Grouping Information Using the Tukey Method and 95% Confidence

| CN | N | Mean  | Grouping |
|----|---|-------|----------|
| D0 | 3 | 236,5 | A        |
| D1 | 3 | 80,41 | B        |
| D2 | 3 | 64,59 | B        |

Means that do not share a letter are significantly different.

## One-way ANOVA: d60 versus CN

### Method

Null hypothesis All means are equal  
Alternative hypothesis At least one mean is different  
Significance level  $\alpha = 0,05$

Equal variances were assumed for the analysis.

### Factor Information

| Factor | Levels | Values     |
|--------|--------|------------|
| CN     | 3      | D0; D1; D2 |

### Analysis of Variance

| Source | DF | Adj SS | Adj MS | F-Value | P-Value |
|--------|----|--------|--------|---------|---------|
| CN     | 2  | 899,9  | 450,0  | 3,58    | 0,095   |
| Error  | 6  | 753,9  | 125,6  |         |         |
| Total  | 8  | 1653,8 |        |         |         |

### Model Summary

| S       | R-sq   | R-sq(adj) | R-sq(pred) |
|---------|--------|-----------|------------|
| 11,2091 | 54,42% | 39,22%    | 0,00%      |

### Means

| CN | N | Mean  | StDev | 95% CI        |
|----|---|-------|-------|---------------|
| D0 | 3 | 43,2  | 18,8  | (27,4; 59,1)  |
| D1 | 3 | 24,26 | 3,72  | (8,42; 40,09) |
| D2 | 3 | 20,33 | 3,37  | (4,49; 36,16) |

Pooled StDev = 11,2091

## Tukey Pairwise Comparisons

### Grouping Information Using the Tukey Method and 95% Confidence

| CN | N | Mean  | Grouping |
|----|---|-------|----------|
| D0 | 3 | 43,2  | A        |
| D1 | 3 | 24,26 | A        |
| D2 | 3 | 20,33 | A        |

Means that do not share a letter are significantly different.

## One-way ANOVA: d75 versus CN

### Method

Null hypothesis All means are equal  
Alternative hypothesis At least one mean is different  
Significance level  $\alpha = 0,05$

Equal variances were assumed for the analysis.

### Factor Information

| Factor | Levels | Values     |
|--------|--------|------------|
| CN     | 3      | D0; D1; D2 |

### Analysis of Variance

| Source | DF | Adj SS | Adj MS | F-Value | P-Value |
|--------|----|--------|--------|---------|---------|
| CN     | 2  | 322,2  | 161,09 | 1,75    | 0,252   |
| Error  | 6  | 551,8  | 91,96  |         |         |
| Total  | 8  | 874,0  |        |         |         |

### Model Summary

| S       | R-sq   | R-sq(adj) | R-sq(pred) |
|---------|--------|-----------|------------|
| 9,58976 | 36,86% | 15,82%    | 0,00%      |

### Means

| CN | N | Mean  | StDev | 95% CI           |
|----|---|-------|-------|------------------|
| D0 | 3 | 20,91 | 14,53 | ( 7,36; 34,46)   |
| D1 | 3 | 9,42  | 7,95  | ( -4,13; 22,96)  |
| D2 | 3 | 7,289 | 1,280 | (-6,259; 20,836) |

Pooled StDev = 9,58976

## Tukey Pairwise Comparisons

### Grouping Information Using the Tukey Method and 95% Confidence

| CN | N | Mean  | Grouping |
|----|---|-------|----------|
| D0 | 3 | 20,91 | A        |
| D1 | 3 | 9,42  | A        |
| D2 | 3 | 7,289 | A        |

Means that do not share a letter are significantly different.

## One-way ANOVA: d90 versus CN

### Method

Null hypothesis All means are equal  
Alternative hypothesis At least one mean is different  
Significance level  $\alpha = 0,05$

Equal variances were assumed for the analysis.

### Factor Information

| Factor | Levels | Values     |
|--------|--------|------------|
| CN     | 3      | D0; D1; D2 |

### Analysis of Variance

| Source | DF | Adj SS  | Adj MS  | F-Value | P-Value |
|--------|----|---------|---------|---------|---------|
| CN     | 2  | 1,787   | 0,8936  | 0,02    | 0,982   |
| Error  | 6  | 297,091 | 49,5152 |         |         |
| Total  | 8  | 298,879 |         |         |         |

### Model Summary

| S       | R-sq  | R-sq(adj) | R-sq(pred) |
|---------|-------|-----------|------------|
| 7,03671 | 0,60% | 0,00%     | 0,00%      |

### Means

| CN | N | Mean   | StDev | 95% CI           |
|----|---|--------|-------|------------------|
| D0 | 3 | 22,99  | 8,46  | ( 13,05; 32,94)  |
| D1 | 3 | 23,94  | 8,62  | ( 14,00; 33,88)  |
| D2 | 3 | 23,939 | 1,623 | (13,998; 33,880) |

Pooled StDev = 7,03671

## Tukey Pairwise Comparisons

### Grouping Information Using the Tukey Method and 95% Confidence

| CN | N | Mean   | Grouping |
|----|---|--------|----------|
| D1 | 3 | 23,94  | A        |
| D2 | 3 | 23,939 | A        |
| D0 | 3 | 22,99  | A        |

Means that do not share a letter are significantly different.

## One-way ANOVA: d105 versus CN

### Method

Null hypothesis All means are equal  
Alternative hypothesis At least one mean is different  
Significance level  $\alpha = 0,05$

Equal variances were assumed for the analysis.

### Factor Information

| Factor | Levels | Values     |
|--------|--------|------------|
| CN     | 3      | D0; D1; D2 |

### Analysis of Variance

| Source | DF | Adj SS | Adj MS | F-Value | P-Value |
|--------|----|--------|--------|---------|---------|
| CN     | 2  | 103,68 | 51,838 | 21,04   | 0,002   |
| Error  | 6  | 14,78  | 2,464  |         |         |
| Total  | 8  | 118,46 |        |         |         |

### Model Summary

| S       | R-sq   | R-sq(adj) | R-sq(pred) |
|---------|--------|-----------|------------|
| 1,56975 | 87,52% | 83,36%    | 71,92%     |

### Means

| CN | N | Mean   | StDev | 95% CI           |
|----|---|--------|-------|------------------|
| D0 | 3 | 22,74  | 2,25  | ( 20,52; 24,96)  |
| D1 | 3 | 23,939 | 1,119 | (21,722; 26,157) |
| D2 | 3 | 16,216 | 1,046 | (13,998; 18,433) |

Pooled StDev = 1,56975

## Tukey Pairwise Comparisons

### Grouping Information Using the Tukey Method and 95% Confidence

| CN | N | Mean   | Grouping |
|----|---|--------|----------|
| D1 | 3 | 23,939 | A        |
| D0 | 3 | 22,74  | A        |
| D2 | 3 | 16,216 | B        |

Means that do not share a letter are significantly different.

## One-way ANOVA: d120 versus CN

### Method

Null hypothesis All means are equal  
Alternative hypothesis At least one mean is different  
Significance level  $\alpha = 0,05$

Equal variances were assumed for the analysis.

### Factor Information

| Factor | Levels | Values     |
|--------|--------|------------|
| CN     | 3      | D0; D1; D2 |

### Analysis of Variance

| Source | DF | Adj SS | Adj MS | F-Value | P-Value |
|--------|----|--------|--------|---------|---------|
| CN     | 2  | 15,94  | 7,970  | 1,38    | 0,321   |
| Error  | 6  | 34,63  | 5,772  |         |         |
| Total  | 8  | 50,57  |        |         |         |

### Model Summary

| S       | R-sq   | R-sq(adj) | R-sq(pred) |
|---------|--------|-----------|------------|
| 2,40256 | 31,52% | 8,69%     | 0,00%      |

### Means

| CN | N | Mean  | StDev | 95% CI         |
|----|---|-------|-------|----------------|
| D0 | 3 | 22,73 | 3,31  | (19,34; 26,12) |
| D1 | 3 | 19,91 | 1,78  | (16,51; 23,30) |
| D2 | 3 | 19,91 | 1,78  | (16,51; 23,30) |

Pooled StDev = 2,40256

## Tukey Pairwise Comparisons

### Grouping Information Using the Tukey Method and 95% Confidence

| CN | N | Mean  | Grouping |
|----|---|-------|----------|
| D0 | 3 | 22,73 | A        |
| D2 | 3 | 19,91 | A        |
| D1 | 3 | 19,91 | A        |

Means that do not share a letter are significantly different.



## One-way ANOVA: d165 versus CN

### Method

Null hypothesis All means are equal  
Alternative hypothesis At least one mean is different  
Significance level  $\alpha = 0,05$

Equal variances were assumed for the analysis.

### Factor Information

| Factor | Levels | Values     |
|--------|--------|------------|
| CN     | 3      | D0; D1; D2 |

### Analysis of Variance

| Source | DF | Adj SS | Adj MS | F-Value | P-Value |
|--------|----|--------|--------|---------|---------|
| CN     | 2  | 297,0  | 148,52 | 3,49    | 0,099   |
| Error  | 6  | 255,5  | 42,58  |         |         |
| Total  | 8  | 552,5  |        |         |         |

### Model Summary

| S       | R-sq   | R-sq(adj) | R-sq(pred) |
|---------|--------|-----------|------------|
| 6,52504 | 53,76% | 38,35%    | 0,00%      |

### Means

| CN | N | Mean   | StDev | 95% CI           |
|----|---|--------|-------|------------------|
| D0 | 3 | 51,54  | 10,70 | ( 42,32; 60,75)  |
| D1 | 3 | 39,16  | 3,56  | ( 29,94; 48,37)  |
| D2 | 3 | 39,551 | 0,791 | (30,333; 48,769) |

Pooled StDev = 6,52504

## Tukey Pairwise Comparisons

### Grouping Information Using the Tukey Method and 95% Confidence

| CN | N | Mean   | Grouping |
|----|---|--------|----------|
| D0 | 3 | 51,54  | A        |
| D2 | 3 | 39,551 | A        |
| D1 | 3 | 39,16  | A        |

Means that do not share a letter are significantly different.

## One-way ANOVA: d180 versus CN

### Method

Null hypothesis All means are equal  
Alternative hypothesis At least one mean is different  
Significance level  $\alpha = 0,05$

Equal variances were assumed for the analysis.

### Factor Information

| Factor | Levels | Values     |
|--------|--------|------------|
| CN     | 3      | D0; D1; D2 |

### Analysis of Variance

| Source | DF | Adj SS | Adj MS | F-Value | P-Value |
|--------|----|--------|--------|---------|---------|
| CN     | 2  | 483,1  | 241,53 | 4,69    | 0,059   |
| Error  | 6  | 309,3  | 51,54  |         |         |
| Total  | 8  | 792,3  |        |         |         |

### Model Summary

| S       | R-sq   | R-sq(adj) | R-sq(pred) |
|---------|--------|-----------|------------|
| 7,17938 | 60,97% | 47,96%    | 12,18%     |

### Means

| CN | N | Mean  | StDev | 95% CI         |
|----|---|-------|-------|----------------|
| D0 | 3 | 65,75 | 2,00  | (55,61; 75,89) |
| D1 | 3 | 64,07 | 4,75  | (53,93; 74,21) |
| D2 | 3 | 49,44 | 11,32 | (39,30; 59,58) |

Pooled StDev = 7,17938

## Tukey Pairwise Comparisons

### Grouping Information Using the Tukey Method and 95% Confidence

| CN | N | Mean  | Grouping |
|----|---|-------|----------|
| D0 | 3 | 65,75 | A        |
| D1 | 3 | 64,07 | A        |
| D2 | 3 | 49,44 | A        |

Means that do not share a letter are significantly different.
