# Supplementary material for: The Valorization of Biolignin from Esparto Grass (Stipa tenacissima L.) Produced by Green Process CIMV (Compagnie Industrielle de la Matière Végétale) for Fertilization of Algerian Degraded Soil: Impact on the Physicochemical and Biological Properties
Source: MDPI journal article supplement (doi:10.3390/su132313462), 2021-12-06
Supplement: s1 [file s1]

Table S1. p level in repeated measures analysis of variance (RMANOVA)

| Parameter             | Inter subject<br>(Treatment) | Time   | Time * Treatment |
|-----------------------|------------------------------|--------|------------------|
| Soil moisture         | <0.001                       | <0.001 | <0.001           |
| Soil temperature      | 0.015                        | <0.001 | <u>0.126</u>     |
| pH                    | 0.014                        | <0.001 | <0.001           |
| Soil carbon content   | <u>0.084</u>                 | <0.001 | <0.001           |
| Soil nitrogen content | <0.001                       | <0.001 | <0.001           |
| Ratio C/N             | <0.001                       | <0.001 | <0.001           |
| Bacteria              | <0.001                       | <0.001 | <0.001           |
| Bungi                 | 0.020                        | <0.001 | <0.001           |
| Laccase activity      | <0.001                       | <0.001 | <0.001           |
| E4/E6                 | <0.001                       | <0.001 | <0.001           |

p < 0.001; p < 0.05; /: no significant difference.
