# Supplementary material for: The Valorization of Biolignin from Esparto Grass (Stipa tenacissima L.) Produced by Green Process CIMV (Compagnie Industrielle de la Matière Végétale) for Fertilization of Algerian Degraded Soil: Impact on the Physicochemical and Biological Properties
Source: MDPI journal article supplement (doi:10.3390/su132313462), 2021-12-06
Supplement: s1 [file s1]

Table S2. Values of the physicochemical test of samples soil (D0 and D2) during 180 days.

| T (°C) | D0                             | D2                          |
|--------|--------------------------------|-----------------------------|
| 0d     | 13 ±1 <sup>a</sup>             | 13 ±1 <sup>a</sup>          |
| 15d    | 13 ±0.5 <sup>a</sup>           | 14 ±1 <sup>a</sup>          |
| 30d    | 13 ±1.732 <sup>a</sup>         | 14 ±1 <sup>a</sup>          |
| 45d    | 14 ±1 <sup>a</sup>             | 16 ±1 <sup>a</sup>          |
| 60d    | 19 ±1 <sup>a</sup>             | 22 ±1 <sup>a</sup>          |
| 75d    | 18 ±1 <sup>b</sup>             | 22 ±1.732 <sup>a</sup>      |
| 90d    | 25 ±1.732 <sup>a</sup>         | 26 ±0.5 <sup>a</sup>        |
| 105d   | 32 ±1.732 <sup>a</sup>         | 34 ±1 <sup>a</sup>          |
| 120d   | 35 ±1 <sup>a</sup>             | 38 ±1 <sup>a</sup>          |
| 165d   | 25 ±1 <sup>a</sup>             | 29 ±3 <sup>a</sup>          |
| 180d   | 19 ±2.646 <sup>a</sup>         | 22 ±2 <sup>a</sup>          |
| ω%     | D0                             | D2                          |
| 0d     | 60.1 ±0.1 <sup>a</sup>         | 60.10.1 <sup>a</sup>        |
| 15d    | 25.243 ±1.168 <sup>c</sup>     | 32.05 ±0.902 <sup>a</sup>   |
| 30d    | 20.717 ±0.826 <sup>b</sup>     | 22.333 ±1.289 <sup>b</sup>  |
| 45d    | 20.767 ±1.047 <sup>b</sup>     | 22.433 ±0.503 <sup>b</sup>  |
| 60d    | 18.517 ±0.5 <sup>b</sup>       | 23.667 ±2.122 <sup>a</sup>  |
| 75d    | 13.883 ±0.936 <sup>c</sup>     | 20.533 ±1.286 <sup>a</sup>  |
| 90d    | 4.2 ±1.045 <sup>c</sup>        | 10.05 ±0.902 <sup>b</sup>   |
| 105d   | 12.117 ±0.315 <sup>a</sup>     | 11.767 ±1.079 <sup>a</sup>  |
| 120d   | 11.567 ±0.666 <sup>a</sup>     | 9.567 ±0.5 <sup>b</sup>     |
| 165d   | 23.717 ±0.375 <sup>a</sup>     | 26.417 ±0.503 <sup>a</sup>  |
| 180d   | 20.283 ±1.005 <sup>b</sup>     | 25.717 ±1.270 <sup>a</sup>  |
| pH     | D0                             | D2                          |
| 0d     | 8.73 ±0.050 <sup>a</sup>       | 8.34 ±0.424 <sup>a</sup>    |
| 15d    | 7.24 ±0.086 <sup>b</sup>       | 7.51 ±0.071 <sup>a</sup>    |
| 30d    | 7.39 ±0.031 <sup>b</sup>       | 7.6 ±0.020 <sup>a</sup>     |
| 45d    | 7.24 ±0.081 <sup>b</sup>       | 7.54 ±0.064 <sup>a</sup>    |
| 60d    | 8.76 ±0.066 <sup>a</sup>       | 8.47 ±0.017 <sup>c</sup>    |
| 75d    | 8.67 ±0.025 <sup>a</sup>       | 8.16 ±0.072 <sup>b</sup>    |
| 90d    | 7.62 ±0.115 <sup>a</sup>       | 7.7 ±0.035 <sup>a</sup>     |
| 105d   | 7.76 ±0.092 <sup>a</sup>       | 7.52 ±0.081 <sup>a</sup>    |
| 120d   | 7.8 ±0.157 <sup>a</sup>        | 7.63 ±0.085 <sup>a</sup>    |
| 165d   | 7.62 ±0.101 <sup>ab</sup>      | 7.52 ±0.025 <sup>b</sup>    |
| 180d   | 7.25 ±0.234 <sup>a</sup>       | 7.06 ±0.093 <sup>a</sup>    |
| C %    | D0                             | D2                          |
| 0d     | 0.872 ±1.360E-16 <sup>c</sup>  | 1.086 ±0 <sup>a</sup>       |
| 15d    | 0.948 ±1.948E-01 <sup>a</sup>  | 0.797 ±0.058 <sup>a</sup>   |
| 30d    | 0.948 ±2.530E-01 <sup>a</sup>  | 1.692 ±0.269 <sup>a</sup>   |
| 45d    | 1.157 ±1.338E-01 <sup>b</sup>  | 1.802 ±0.095 <sup>a</sup>   |
| 60d    | 0.775 ±3.140E-01 <sup>a</sup>  | 0.678 ±0.102 <sup>a</sup>   |
| 75d    | 0.339 ±2.356E-01 <sup>a</sup>  | 0.242 ±0.060 <sup>a</sup>   |
| 90d    | 0.291 ±5.243E-02 <sup>a</sup>  | 0.339 ±0.031 <sup>a</sup>   |
| 105d   | 0.291 ±5.526E-02 <sup>ab</sup> | 0.242 ±0.015 <sup>b</sup>   |
| 120d   | 0.291 ±2.664E-02 <sup>a</sup>  | 0.291 ±0.026 <sup>a</sup>   |
| 165d   | 0.339 ±2.201E-02 <sup>b</sup>  | 0.581 ±0.012 <sup>a</sup>   |
| 180d   | 0.533 ±1.080E-01 <sup>a</sup>  | 0.727 ±0.166 <sup>a</sup>   |
| N %    | D0                             | D2                          |
| 0d     | 0.0033 ±0 <sup>c</sup>         | 0.0042 ±0 <sup>a</sup>      |
| 15d    | 0.0049 ±0 <sup>b</sup>         | 0.018 ±0.0028 <sup>a</sup>  |
| 30d    | 0.0034 ±0.0025 <sup>b</sup>    | 0.0408 ±0.0102 <sup>a</sup> |
| 45d    | 0.0049 ±0.0000 <sup>c</sup>    | 0.0278 ±0.0057 <sup>a</sup> |
| 60d    | 0.018 ±0.0028 <sup>b</sup>     | 0.0327 ±0.0028 <sup>a</sup> |
| 75d    | 0.0163 ±0.0028 <sup>b</sup>    | 0.0327 ±0.0028 <sup>a</sup> |
| 90d    | 0.0131 ±0.0028 <sup>a</sup>    | 0.0147 ±0 <sup>a</sup>      |
| 105d   | 0.0131 ±0.0028 <sup>a</sup>    | 0.0147 ±0 <sup>a</sup>      |
| 120d   | 0.0131 ±0.0028 <sup>a</sup>    | 0.0147 ±0 <sup>a</sup>      |
| 165d   | 0.0065 ±0.0028 <sup>b</sup>    | 0.0147 ±0 <sup>a</sup>      |
| 180d   | 0.0082 ±0.0028 <sup>b</sup>    | 0.0147 ±0 <sup>a</sup>      |
| C/N    | D0                             | D2                          |
| 0d     | 266.967 ±0.000 <sup>a</sup>    | 260.969 ±0.000 <sup>c</sup> |
| 15d    | 193.403 ±39.749 <sup>a</sup>   | 44.333 ±8.819 <sup>b</sup>  |
| 30d    | 276.29 ±9.819 <sup>a</sup>     | 41.433 ±6.945 <sup>c</sup>  |
| 45d    | 236.118 ±27.299 <sup>a</sup>   | 64.91 ±4.948 <sup>b</sup>   |
| 60d    | 43.146 ±18.754 <sup>a</sup>    | 20.764 ±3.373 <sup>a</sup>  |
| 75d    | 20.764 ±14.526 <sup>a</sup>    | 7.416 ±1.280 <sup>a</sup>   |
| 90d    | 22.247 ±8.464 <sup>a</sup>     | 23.071 ±1.623 <sup>a</sup>  |
| 105d   | 22.247 ±2.246 <sup>a</sup>     | 16.479 ±1.046 <sup>b</sup>  |
| 120d   | 22.247 ±3.310 <sup>a</sup>     | 19.775 ±1.783 <sup>a</sup>  |
| 165d   | 51.91 ±10.697 <sup>a</sup>     | 39.551 ±0.791 <sup>a</sup>  |
| 180d   | 65.259 ±1.998 <sup>a</sup>     | 49.438 ±1.319 <sup>a</sup>  |

The significant differences in each parameter among different treatments were determined by one-way ANOVA. Different letters indicate significant difference at P <0.05.
