# Supplementary material for: The Valorization of Biolignin from Esparto Grass (Stipa tenacissima L.) Produced by Green Process CIMV (Compagnie Industrielle de la Matière Végétale) for Fertilization of Algerian Degraded Soil: Impact on the Physicochemical and Biological Properties
Source: MDPI journal article supplement (doi:10.3390/su132313462), 2021-12-06
Supplement: s1 [file s1]

Table S3.Values of the biological test of soil samples (D0 and D2) during 180 days.

| Time (day) |                     | 0d                       | 30d                      | 60d                      | 90d                      | 120d                      | 180d                     |
|------------|---------------------|--------------------------|--------------------------|--------------------------|--------------------------|---------------------------|--------------------------|
| D0         | Bacteria CFU/g soil | 110±10 <sup>a</sup>      | 129000±1000 <sup>b</sup> | 100±0 <sup>a</sup>       | 72000±2000 <sup>c</sup>  | 40000±4000 <sup>c</sup>   | 20000±10000 <sup>c</sup> |
|            | Fungi CFU/g of soil | 7000±3000 <sup>a</sup>   | 32000±3000 <sup>a</sup>  | 4000±2000 <sup>ab</sup>  | 4000±1000 <sup>b</sup>   | 140±20 <sup>c</sup>       | 30000±2000 <sup>a</sup>  |
|            | Laccase UI/g soil   | 0.593±0.085 <sup>b</sup> | 0.89±0.025 <sup>b</sup>  | 0.797±0.036 <sup>a</sup> | 0.551±0.009 <sup>c</sup> | 0.848±0.01 <sup>c</sup>   | 1.251±0.043 <sup>a</sup> |
|            | E4/E6               | 0.534±0.109 <sup>c</sup> | 1.136±0.341 <sup>c</sup> | 1.182±0.282 <sup>c</sup> | 1.111±0.096 <sup>b</sup> | 1.818±0.078 <sup>b</sup>  | 1.714±0.237 <sup>b</sup> |
| Time (day) |                     | 0d                       | 30d                      | 60d                      | 90d                      | 120d                      | 180d                     |
| D2         | Bacteria CFU/g soil | 140±20 <sup>a</sup>      | 47000±1000 <sup>c</sup>  | 130±20 <sup>a</sup>      | 87000±7000 <sup>b</sup>  | 100000±10000 <sup>a</sup> | 70000±20000 <sup>b</sup> |
|            | Fungi CFU/g of soil | 3000±1000 <sup>ab</sup>  | 47000±3000 <sup>a</sup>  | 8000±2000 <sup>a</sup>   | 19000±1000 <sup>a</sup>  | 21000±4359 <sup>a</sup>   | 7000±2000 <sup>b</sup>   |
|            | Laccase UI/g soil   | 1.187±0.015 <sup>a</sup> | 2.967±0.025 <sup>a</sup> | 0.593±0.047 <sup>b</sup> | 1.950±0.043 <sup>b</sup> | 4.239±0.276 <sup>a</sup>  | 1.272±0.02 <sup>a</sup>  |
|            | E4/E6               | 4.167±0.890 <sup>a</sup> | 5.440±0.953 <sup>b</sup> | 1.266±0.794 <sup>a</sup> | 5.800±0.507 <sup>a</sup> | 9.667±0.369 <sup>a</sup>  | 5.833±0.780 <sup>a</sup> |

The significant differences in each parameter among different treatments were determined by one-way ANOVA. Different letters indicate significant difference at ( $p < 0.05$ ).
